## Title: Clots reveal anomalous elastic behavior of fiber networks

### Authors

Andrei Zakharov<sup>1,2</sup>, Myra Awan<sup>3</sup>, Terrence Cheng<sup>3</sup>, Arvind Gopinath<sup>4</sup>, Sang-Joon John Lee<sup>5</sup>, Anand K. Ramasubramanian<sup>3\*</sup>, Kinjal Dasbiswas<sup>1\*</sup>

### Affiliations

<sup>1</sup>Department of Physics, University of California, Merced, CA 95343, USA.

<sup>2</sup>Department of Materials Science and Engineering, University of Pennsylvania, Philadelphia, PA 19104, USA.

<sup>3</sup>Department of Chemical and Materials Engineering, San José State University, San José, CA 95192, USA.

<sup>4</sup>Department of Bioengineering, University of California, Merced, CA 95343, USA.

<sup>5</sup>Department of Mechanical Engineering, San José State University, San José, CA 95192, USA.

\* corresponding authors:

[kdasbiswas@ucmerced.edu](mailto:kdasbiswas@ucmerced.edu), [anand.ramasubramanian@sjsu.edu](mailto:anand.ramasubramanian@sjsu.edu)

### Abstract

The mechanical properties of many soft natural and synthetic biological materials are relevant to their function. The emergence of these properties from the collective response of the structural components of the material to external stress as well as to intrinsic cell traction, remains poorly understood. Here, we examine the nonlinear elastic behavior of blood clots by combining microscopy and rheological measurements with an elastic network model that accounts for the stretching, bending, and buckling of constituent fibrin fibers. We show that the inhibition of fibrin crosslinking reduces fiber bending stiffness and introduces an atypical fiber buckling-induced softening regime at intermediate shear, before the well-characterized stiffening regime. We also show that crosslinking and platelet contraction significantly alter force propagation in the network in a strain-dependent manner. Our mechanics-based model, supported by experiments, provides a framework to understand the origins of characteristic and anomalous regimes of non-linear elastic response not only in blood clots, but also more generally in active biopolymer networks.

### INTRODUCTION

Fibrous materials form the structural and functional basis for numerous biological processes and biomedical applications (1). Many fibrous biomaterials including actin, collagen, and fibrin occur as networks endowed with unique, non-linear mechanical properties that are key to their biological functions such as maintaining structural integrity, tissue architecture, and facilitating cell-cell communication (2). Of significance, the branched network of fibrin fibers is the fundamental building block of blood clots, and is integral to biomedical applications such as tissue scaffolding and surgical adhesives (3). Fibrin networks provide optimal strength, stiffness, and stability appropriate for these physiological processes (4). A fibrin network results from the thrombin-catalyzed polymerization of fibrinogen monomers into protofibrils, which are crosslinked by the

50 transglutaminase enzyme FXIII-A to form the complex hierarchical structure of fibrin  
51 fibers (1). The network is strengthened by the forces generated by the active contraction of  
52 platelets bound to fibrin, thus prestressing the network (5); and it is also modified to a  
53 lesser, nonetheless important, extent by the passive inclusions of red blood cells (RBCs)  
54 (6). Although the mechanics of fibrin networks has been extensively studied (7), the  
55 ability to predict the non-linear mechanical behavior of the network from the molecular-  
56 scale structure and topology of constituent fibers remains elusive.

57  
58 The mechanical response of blood clots to external loads is a combined response of the  
59 fibrin network, platelets associated with the network, and of the void spaces composed of  
60 plasma and the RBCs. To understand the overall structure-mechanics relationships of the  
61 composite blood clot, several biomechanical models of varying scope have been  
62 developed (recently reviewed in (8)). These models include constitutive or  
63 phenomenological approaches to study mechanical properties of clots as a function of clot  
64 composition (9),(10); continuum models to predict the macroscopic, large deformation of  
65 clots such as for predicting viscoelastic responses and clot rupture (11),(12); mesoscopic  
66 models that explicitly account for the mechanics of individual fibers as a collection of  
67 elastic elements connected to form two-dimensional (2D) or three-dimensional (3D)  
68 networks with prescribed topology (13),(14),(15); and microscale, molecular models of  
69 the unfolding of single fibrin fibers (16). Of relevance to the current work, mesoscopic  
70 models not only describe the elastic response of the networks under macroscopic  
71 deformation modes such as shear or uniaxial tension but also provide important insights  
72 into local fiber deformation, and long-range force transmission due to platelet-fiber  
73 interactions (17),(18).

74  
75 In this work, we aim to understand the impact of fiber crosslinking and platelet-mediated  
76 network contraction on local and macroscopic clot mechanics. Experiments have revealed  
77 that crosslinking increases clot compaction, confers mechanical stability, and also  
78 enhances chemical stability by protecting against fibrinolysis (19),(20),(21). Atomic force  
79 microscopy (AFM) and optical tweezer studies have shown that these crosslinks  
80 significantly increase the extensibility and elasticity of even single fibrin fibers (22),(23).  
81 In addition, it has been shown that anisotropic, fibrous materials, such as collagen and  
82 fibrin, transmit forces over a longer range compared with linear elastic materials (24),(25).  
83 Such mechanical signaling can be independent of or act complementary to chemical  
84 signaling, providing a longer-ranged and faster pathway for cell-cell communications in  
85 tissues (26),(27). However, the effect of crosslinking in the stress-bearing elements, i.e., in  
86 individual fibrin fibers, on the mechanics of 3D fibrin networks, is poorly understood.  
87 Specifically, the manner in which the fibrin network serves as a conduit for the  
88 transmission of contractile forces generated by the platelets, and the role played by fibrin  
89 crosslinking in this process, remains unknown (28),(29).

90  
91 To this end, we sought to understand the physical forces governing the mechanical  
92 response of clots to externally imposed shear loading. Our experiments reveal a heretofore  
93 unreported, anomalous, regime of shear softening in clots, characterized by an unexpected  
94 dip in the shear modulus with increasing shear stress, when fibrin crosslinking is inhibited.  
95 Importantly this softening occurs in an important biophysical regime of shear, similar to  
96 stresses induced by blood flow (30). Motivated by these observations, we develop a  
97 minimal elastic network model to quantitatively study clot mechanics, and examine the  
98 network response to applied shear. To describe the typical structure of a fibrin network  
99 (green) with embedded platelet aggregates (red) shown in the experimental image in **Fig.**

100 **1A**, we create a two-dimensional (2D) elastic network model comprising fibers  
101 represented by bonds in an irregular triangular network. The mechanical response of a 2D  
102 planar network is similar to, and captures the stiffening behavior of a 3D network as well  
103 (31). Disorder in the network is introduced by removing bonds randomly with a  
104 probability  $1-p$ , to reach an average coordination number. The average coordination  
105 number  $\langle z \rangle$  is expected to be between 3 and 4 for fiber networks, these values correspond  
106 to branching and crossing fibers, respectively.

107  
108 The elastic response of a fiber network to external shear depends on both individual fiber  
109 mechanics as well as the network architecture (32). Although the network is sheared at a  
110 macroscopic scale, individual fibers may stretch, compress, bend, and buckle under  
111 imposed forces, where the typical constitutive relation for a fiber is depicted in **Fig. 1B**.  
112 Importantly the network stability is governed by the rigidity percolation threshold, which  
113 for a network of central force springs (equal and opposite forces along the spring on a  
114 connected pair of nodes) in 2D is predicted from constraint counting originally due to  
115 Maxwell (33) to be  $\langle z \rangle = 4$ . Below this isostatic point for central force springs, a fiber  
116 network can be stabilized by the bending rigidity of fibers (34). Since the characteristic  
117 bending energy of slender fibers is much lower than stretching energy (35) networks in the  
118 under-coordinated regime ( $\langle z \rangle < 4$ ) respond to external shear through floppy, bending-  
119 dominated deformation modes. These floppy modes comprise rotating bonds resulting in  
120 an anomalous elastic regime not described by a continuum elastic theory (36). At higher  
121 shear, bonds are aligned in the shear direction and such floppy modes are no longer  
122 available. As a result the network exhibits a stiffening transition from a bending to a  
123 stretching-dominated regime (37). Such a bending-to-stretching stiffening transition has  
124 been shown to occur in collagen (31), another structured fibrous material, and is expected  
125 to be a key contributor to the nonlinear shear stiffening of biopolymer networks in general.

126  
127 In this work, we combine experimental measurements with detailed numerical simulations  
128 to investigate the non-linear mechanics of sheared blood clots. We numerically compute  
129 the mechanical equilibrium states of the model elastic networks under external shear, as  
130 detailed in the *Methods* section. The model results are then compared with experiments  
131 that subject plasma clots to shear in a rheometer (**Fig. 1C**), to infer mechanical properties  
132 of the fibrin network. Our model predicts an abrupt clot stiffening associated with  
133 transition from bending to stretching dominated regime when strain increases, and  
134 consistent with experimental observations, it also predicts a softening dip in the shear  
135 modulus, when the bending stiffness of individual fibers is reduced. We quantitatively  
136 analyze the competition between elastic energy contributions from different fiber  
137 deformation modes that enable us to elucidate the different observed regimes in the  
138 macroscopic mechanical response of the clot. Our model also reveals that the mechanical  
139 force transmission through the network is strongly influenced by crosslinking, and  
140 provides insights into the importance of crosslinking on the prestress induced by platelets  
141 that contracts and stiffens clots.

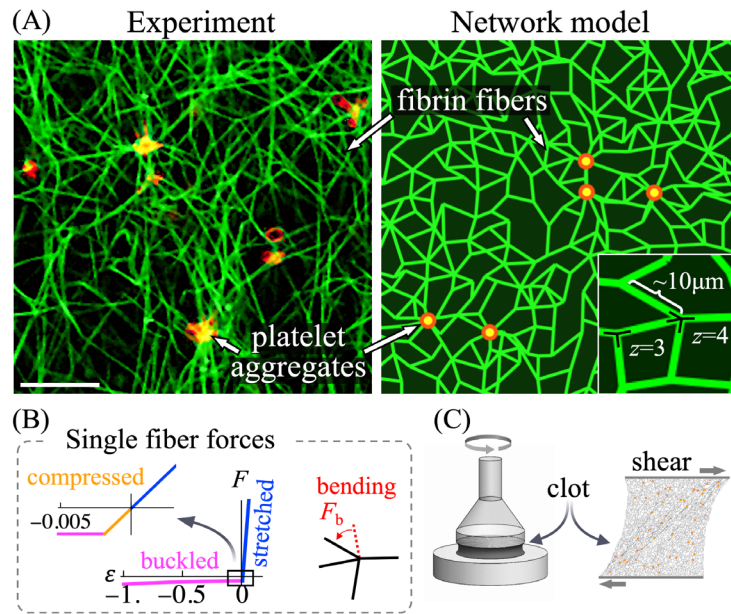

**Fig. 1. Active network model of plasma clots.** (A) Microscopic image of platelet rich plasma (PRP) clot and its approximation by the 2D elastic network model of similar connectivity and length scale (scale bar: 10  $\mu\text{m}$ ). Fibrin fibers (green) forming a network are modeled by randomly oriented bonds connected at nodes representing branch points. Platelets (red) are modeled as point sources of contractile forces. The network topology is determined by the number of bonds connected at each node (the average coordination number  $\langle z \rangle$ ) and by the spacing between the nodes (here, the average value is chosen to be 10  $\mu\text{m}$ , similar to the average fibrin length observed in microscope images). (B) The reaction force  $F$  of each fiber to an applied axial strain  $\epsilon$  exhibits three distinct regimes: stiff linear stretching, compression, and soft buckling when axial compression exceeds a small critical value (inset). In addition, a transverse load acting on a fiber is resisted by bending forces ( $F_b$ ) at each node when the angle between any two neighboring bonds deviates from its reference value. (C) Shear strain was applied to plasma clots in rheometry experiments, and in model elastic network simulations, to test their elastic response to deformation.

## RESULTS

### Crosslinking alters the shear response of fibrin networks by enhancing bending stiffness

To examine the mechanical properties of fibrin networks derived from blood clots, we performed rheological experiments on plasma devoid of red blood cells (RBCs). We thus avoid the possible complicating modifications that RBCs make to the structure and mechanics of clots, such as enhanced viscosity (6) and compressive stiffening (38). To further isolate the contribution of platelets, we first prepared platelet-poor plasma (PPP) clots. The “clot stabilizing factor” FXIII-A crosslinks (or ligates) protofibrils within fibrin fibers by introducing covalent linkages between the  $\alpha$ -chains and  $\gamma$ -chains of fibrin monomers. The  $\gamma$ - $\gamma$  crosslinks are formed between adjacent fibrinogen monomers within a protofibril, while the  $\alpha$ - $\alpha$  crosslinks ligate across two protofibril strands. To understand the importance of protofibril crosslinking to clot structure and mechanics, we also inhibited the crosslinker FXIII-A by treatment with the small molecule inhibitor T101 (20). The resulting structural differences between PPP clots with and without crosslinking are shown in Fig. 2A. The inhibition of the crosslinker FXIII-A by T101 degenerates inter-protofibril lateral  $\alpha$ - $\alpha$  interactions, and also weakens intra-protofibril end-to-end  $\gamma$ - $\gamma$  interactions, in a dose-dependent manner (39). The inhibition of these crosslinks does not affect the formation of protofibrils, but reduces the rates of their lateral aggregation and branching. On purely mechanical grounds, we expect that reduced lateral links between protofibrils will result in easier bending of the composite fibers they constitute (40), as



illustrated in **Fig. 2B**. Consistent with this expectation, more bent and buckled fiber shapes, including kinks, are observed in **Fig. 2A** (right panel) when crosslinking is inhibited by T101 treatment. Sharp bends along with wavy and crimped structures of uncrosslinked fibrin are clearly visible in the inset of **Fig. 2A**.

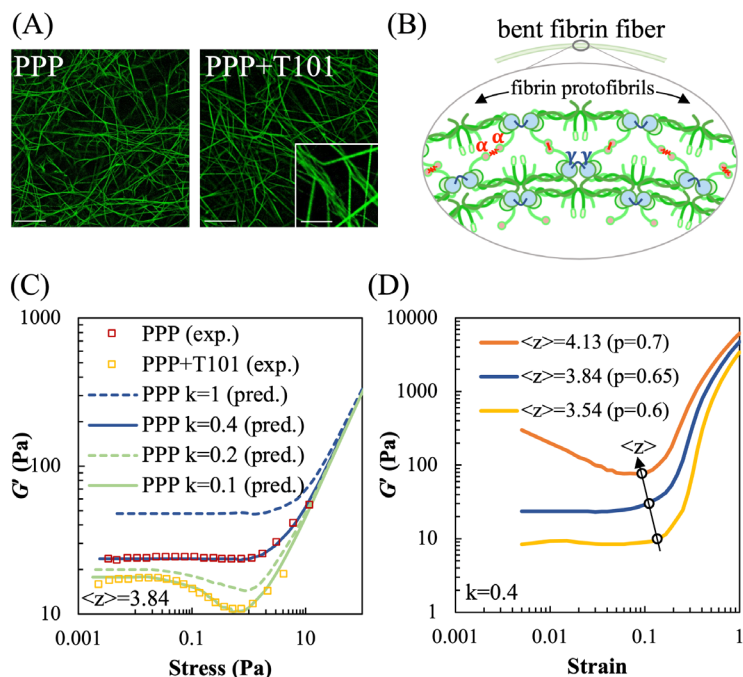

**Fig. 2. Effect of fibrin crosslinking on shear stiffness regimes of passive platelet poor plasma (PPP) clots.** (A) Microscopic images of crosslinked (PPP) and uncrosslinked (PPP+T101) clots. Inset on the right shows a loosely crosslinked and crimped protofibrils due to inhibition of FXIII-A by T101 treatment. Scale bars: 10  $\mu\text{m}$  (5  $\mu\text{m}$  for inset). (B) Schematic of bent fibrin fiber showing protofibril structure. Fibrin oligomers assemble into protofibrils, which, in turn, are crosslinked by  $\gamma\text{-}\gamma$ ,  $\alpha\text{-}\alpha$ , and  $\alpha\text{-}\gamma$  interactions by FXIII-A. The crosslinks are expected to enhance bending stiffness of fibers. (C) Shear modulus ( $G'$ ) of crosslinked (PPP) and uncrosslinked (PPP+T101) clots show a highly non-linear dependence on applied stress in both experiment (squares) and simulations (lines). The factor  $k$  and  $\langle z \rangle$  in the simulated curves represent the reduced bending modulus from a reference value, and average coordination number of network nodes, respectively. Simulations were performed at varying values of the parameters  $k$  and  $\langle z \rangle$  to match the experimental data. The model results, at a reduced bending modulus ( $k = 0.1$ , solid green line), capture the effect of crosslinker inhibition by T101 treatment on the measured shear modulus (experiments, yellow squares). Both experimental data and model prediction in this case exhibit a noticeable softening dip at  $\sim 0.2$  Pa. (D) Increasing the average coordination number  $\langle z \rangle$ , realized in simulations through less random bond removal ( $p$  denotes probability of bonds being present), leads to higher shear moduli due to greater number of bond springs, and concomitantly reduces the critical strain at which the network abruptly transitions to a stiffer regime. Thus, the position of the transition point in strain can be used to determine the  $\langle z \rangle$  appropriate for the experimental data.

Plasma clots were then prepared between the plates of a rheometer for a subsequent shear assay (see *Methods*). Clot gelation was monitored at low oscillatory strain ( $<1\%$ ) at low frequency of oscillation (1 Hz) in a linear viscoelastic regime. The elastic storage modulus ( $G'$ ) increased over the loss modulus ( $G''$ ) during gelation and reached a saturation value of about  $\sim 50$  Pa after 45 minutes (**Fig. S1**). Because of abundant exogenous thrombin, the lag phase typical of clot initiation was not observable, but the rapid lag phase due to fibrin polymerization was followed by a saturation, indicating the formation of a stable clot structure. Interestingly, T101 treatment reduced the initial clot stiffness (at time  $t = 0$ ) but had no impact on the fibrin polymerization rate as indicated by constancy in the slope of

215 the lag phase. Overall, PPP clots treated with T101 demonstrated up to threefold lowering  
216 in stiffness in the steady state compared to untreated clots.

217  
218 Following the initial period of gelation, we recorded the storage modulus  $G'$  of PPP clots  
219 as a function of the applied amplitude of shear stress (data shown as red squares in **Fig.**  
220 **2C**). The loss modulus  $G''$  remained low indicating that the mechanical response is  
221 primarily elastic. At low shear stress ( $< 1$  Pa) the clot stiffness stayed constant, but with  
222 increasing shear (up to 10 Pa), there was a significant  $\sim 3$ -fold increase in stiffness. In our  
223 experiments, we observed that at stresses higher than 70 Pa,  $G'$  decreased rapidly,  
224 indicating irreversible plastic deformations (data not shown). The T101-treated,  
225 uncrosslinked PPP clots (data shown as yellow squares) also showed a near constant shear  
226 modulus at low shear stress ( $< 0.1$  Pa), and stiffening at high stress ( $\sim 10$  Pa). However, at  
227 intermediate stresses between 0.1 Pa to 1 Pa, unlike the crosslinked clots, the  
228 uncrosslinked clots showed a noticeable decrease in shear modulus by  $\sim 10$  Pa. For  
229 comparison, we also examined the response of fibrin gels formed from 3 mg/mL  
230 fibrinogen by the addition of 1 U/mL thrombin and 20 mM  $\text{CaCl}_2$ ; and from uncrosslinked  
231 fibrin gels formed in the presence of 100  $\mu\text{M}$  T101. As shown in **Fig. S2**, the response of  
232 crosslinked fibrin gels to shear stresses was similar to that of crosslinked PPP clots: strain-  
233 independent linear regime at low applied stress, and strain-stiffening at high applied stress.  
234 The uncrosslinked fibrin gels showed a response similar to uncrosslinked PPP clots:  
235 strain-independent, strain-softening, and strain-stiffening behavior at low, intermediate,  
236 and high stress, respectively. The reproducibility of this mechanical behavior between  
237 plasma clots and fibrin gels suggests that this is a characteristic elastic response of the  
238 fibrin network, independent of other blood proteins.

239  
240 To explain the highly nonlinear strain-dependent softening and stiffening in crosslinked  
241 and uncrosslinked clots, we simulate the response of our model elastic network to shear  
242 stress (see *Methods*). There are two important reduced dimensionless parameters in the  
243 network model: the mechanical properties of the fibers, namely the ratio between bending  
244 and stretching stiffnesses,  $\kappa/(\mu l_0^2)$ , where  $l_0$  is a characteristic fiber length scale given by  
245 the distance between branch points; and the connectivity between the fibers in the  
246 network, represented by an average coordination number  $\langle z \rangle$ . The bending to stretching  
247 stiffness ratio  $\kappa/(\mu l_0^2)$  depends on the ratio of fiber diameter to length, which do not appear  
248 explicitly in the model, and is therefore expected to be small for slender fibers. It should  
249 be noted that connectivity in fibrin networks is due to the branching of a single fiber into  
250 two (or rarely three) fibers, or due to the mutual crossing of two individual fibers leading  
251 to entanglement and possible cohesion (41). The resulting coordination number (the  
252 number of fibers at a branchpoint) is set between 3 and 4 (41),(42), leading to a dilute,  
253 under-coordinated network that has connectivity below the isostatic point ( $\langle z \rangle = 4$  in 2D)  
254 for a network of central force springs. The structure of a fibrin fiber is complex (43) and  
255 includes multiple hierarchical structural levels. To build a minimal model and avoid the  
256 structural complexity of fibrin, we treat a fibrin fiber as a single mechanical structure, and  
257 estimate the typical bending to stretching ratio  $\kappa/(\mu l_0^2)$  for a uniform elastic rod ( $\kappa \sim Ed^4$ ,  $\mu$   
258  $\sim Ed^2$ ) using typical, measured values for Young's modulus ( $E$ ), fiber length ( $l$ ) and  
259 diameter ( $d$ ) (22). We then allow the bending modulus to be scaled by a free "softening"  
260 parameter,  $0 < k < 1$ , that is a proxy for the difference of the bending modulus of fibrin, a  
261 crosslinked bundle of protofibrils, from the estimated value for a uniform elastic rod. Prior  
262 experimental work, that measures the elastic modulus for individual uncrosslinked fibers  
263 under bending deformation, suggests that this factor  $k$  is further reduced when the

264 crosslinking FXIII-A is inhibited (22).

265  
266 The bending stiffness scaling factor  $k$  and coordination number  $\langle z \rangle$  were tuned in  
267 simulations to match the experimental shear modulus for PPP clots (**Fig. 2C**). While the  
268 shear modulus at small external shear is expected to be dominated by softer, bending  
269 modes and thus scales with  $k$  (44), we show that the critical strain for the onset of shear  
270 stiffening is relatively insensitive to  $k$ , instead of depending on  $\langle z \rangle$ . This lets us match the  
271 flat low shear region, as well as the stiffening transition point, in the experimental  $G'$  vs.  
272 stress curve for PPP clots, by varying  $k$  and  $\langle z \rangle$ , respectively. The fitted value of the  
273 bending stiffness factor  $k = 0.4$  is smaller than the idealized limit of a uniform elastic rod  
274 corresponding to  $k = 1$ , as expected for a crosslinked bundle of protofilaments (40). The  
275 coordination number of 3.85 that is found to describe the data well lies between 3 and 4,  
276 as expected for fibrous networks. Consistent with our hypothesis that the bending stiffness  
277 is reduced for uncrosslinked fibrin, the model captures the response of uncrosslinked PPP  
278 clots, for  $k = 0.1$ . This lowered bending stiffness also led to a softening dip in the shear  
279 modulus at intermediate strains, similar to that observed in the experimental data. We  
280 explored further the effects of varying network connectivity by simulating the shear  
281 response of over- and under-coordinated networks. As shown in **Fig. 2D**, increasing the  
282 average coordination number  $\langle z \rangle$  leads to stiffer networks, while slightly shifting the  
283 critical strain associated with the onset of network stiffening to smaller values. This is  
284 consistent with the lack of floppy, purely bending modes as the network connectivity  
285 increases beyond the isostatic point ( $\langle z \rangle > 4$ ).

### 287 **Shear softening arises from interplay of bending and buckling dominated modes**

288  
289 Since it is experimentally challenging to discern the mechanical state of individual fibers  
290 under a given applied shear strain, we use simulations to identify the contributions of  
291 different fiber deformation modes to the total elastic energy of the network. These are  
292 shown in **Fig. 3** for the bending stiffness factors obtained in **Fig. 2C**, that corresponds to  
293 crosslinked and uncrosslinked fibrin, respectively. We found that both networks  
294 comprising fibers with stiffer ( $k = 0.4$ ) and softer ( $k = 0.1$ ) bending moduli exhibit three  
295 regimes dominated by fiber bending, buckling, and stretching respectively. Typical  
296 simulated, mechanically equilibrated network configurations at representative strain  
297 values corresponding to these regimes are shown in **Fig. 3A**. The different colors represent  
298 the type of strain in the corresponding bond, i.e. whether it is stretched (blue), compressed  
299 (yellow) or buckled (magenta). Gray (unstrained) bonds can participate in bending modes  
300 by changing their mutual angles (not visualized).

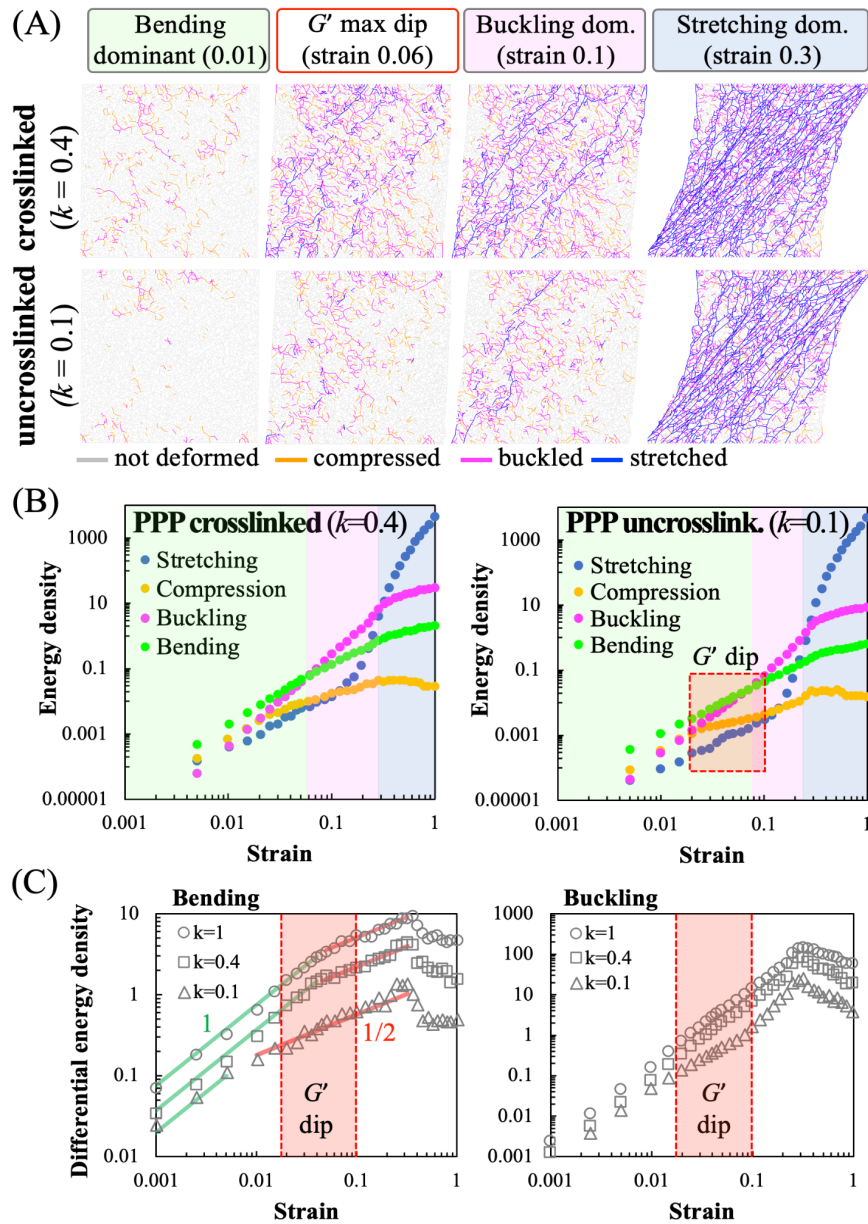

**Fig. 3. Contribution of different deformation modes to shear response of model elastic networks. (A)** Simulation snapshots of deformations of crosslinked and uncrosslinked networks at various applied shear strains. Individual bonds in the network are colored according to whether they are stretched, compressed or buckled. The relative occurrence of the different deformation modes depends on both applied strain and fiber crosslinking (corresponds to the value of the bending and buckling stiffness parameter  $k$ ). **(B)** Calculated elastic energy density corresponding to stretching, compression, bending and buckling modes in model simulations for crosslinked (*left*) and uncrosslinked (*right*) cases. The model predicts that both crosslinked (PPP) and uncrosslinked (PPP+T101) clots exhibit three distinct deformation regimes shown by the colored regions, dominated by fiber bending, buckling and stretching, respectively. The red box indicates the regime of strains where the softening dip in the shear modulus is seen in Fig. 2c, and occurs here near the bending-to-buckling transition. This transition occurs at a higher strain for the uncrosslinked/lower  $k$  network (*right*) resulting in a broader bending-dominated (green) region. **(C)** Differential bending (*left*) and buckling (*right*) energy densities clearly show different power law regimes vs. applied strain. The buckling energy density in the  $k = 0.1$  case an additional shallower regime with a lower slope in the region of the softening dip (red box) before approaching with the higher  $k$  cases. This is consistent with the delayed bending-to-buckling transition seen in **(B)** and fewer buckled bonds in **(A)**.



321 At very low applied strains (less than 5%), deformations in an under-coordinated network  
322 are dominated by bending modes because slender fibers are easier to bend or buckle and  
323 incur less elastic energy cost than being stretched or compressed ( $\kappa/(\mu l_0^2) \ll 1$ ). As a  
324 result, only a few bonds are seen to be stretched at 1% strain at  $k = 0.4$ , and the network  
325 avoids buckling and compression in bonds at  $k = 0.1$ . The constant shear modulus in this  
326 low strain regime scales with the fiber bending modulus (34). At higher applied strains  
327 (greater than 10%), individual bonds align along the principal tension direction, resulting  
328 in many stretched bonds tilted approximately  $45^\circ$  along the shearing direction. In this  
329 regime, the network becomes much stiffer since the stretching energy of individual bonds  
330 is high, and a different scaling law of shear modulus with strain results. This is consistent  
331 with the well-known rigidity transition from the bending to the stretching-dominated  
332 regime under external strain which removes the available bending degrees of freedom  
333 (45). At very high applied strains, the shear modulus reaches the upper limit of stiffness  
334 set by aligned and stretching Hookean springs, and the curves corresponding to different  
335 bending moduli converge in the simulations (Figs. 2C and 2D). This limit is not attained  
336 in our experiments as the clots start to undergo irreversible plastic deformations at large or  
337 oscillatory applied strain (46).  
338

339 Interestingly, for both crosslinked and uncrosslinked networks, there exists an  
340 intermediate regime between the low shear, bending-dominated and high shear, stretching-  
341 dominated regimes (magenta region in Fig. 3B). In this intermediate regime, the greatest  
342 contribution to elastic energy comes from buckled bonds under large compression. In the  
343 simulation snapshots in Fig. 3A, this strong influence from buckling is manifested as a  
344 relatively high fraction of buckled bonds at intermediate strains (5% to 10%), with the  
345 fiber compression oriented approximately transverse to the principal stretching direction.  
346 At such low-to-intermediate strain values, the compression of these bonds exceeds the  
347 buckling threshold, while the stretching is still relatively small. As seen in Fig. 3B, this  
348 intermediate buckling-dominated regime occurs in both the  $k = 0.4$  and  $k = 0.1$  networks.  
349 However, the transition from bending-to-buckling-dominated regimes occurs at slightly  
350 higher strains for the  $k = 0.1$ , compared to the  $k = 0.4$  network. This delayed bending-to-  
351 buckling transition allows for the intermediate, shear softening region (indicated by red  
352 box in Fig. 3B (right)) corresponding to the dip in the  $G'$  curves, seen only for  $k = 0.1$ .  
353

354 To better understand the origin of this shear softening (seen only at lower  $k$ ) and to  
355 identify how the different energy contributions scale with increasing shear strain, we plot  
356 the differential energy density against strain for different  $k$  values in Fig. 3C. The  
357 differential bending energy trends show a transition from a steeper ( $\sim 1$ ) to a shallower  
358 slope ( $\sim 1/2$ ) power law regime, with the transition strain being higher for higher values of  
359  $k$ . This shift in transition strain indicates that the bending energy grows slower with strain,  
360 as buckling, and then stretching, modes take over. Similarly, for  $k = 0.1$ , a shallow-slope  
361 regime is seen in the differential buckling energy. This correlates with the later onset of  
362 the buckling-dominated regime for  $k = 0.1$  seen in Fig. 3B, when compared to cases with  
363 higher values of  $k$ . Taken together, these suggest that the softening dip in shear modulus is  
364 a result of buckling of initially compressed bonds as the strain increases from very low  
365 values. For  $k = 0.1$ , this dip is fully expressed, since the number of stretched bonds is still  
366 very small at this strain regime, while the effect is lost at higher  $k$  when a significantly  
367 larger number of bonds gets stretched. Thus, by inhibiting fibrin crosslinking, our  
368 experiments offer a direct confirmation of this intermediate shear softening effect, which  
369 was previously noted only in simulated elastic networks with buckling (47),(48),(49).  
370

## 371 **Fiber crosslinking promotes efficient force transmission in platelet-contracted networks**

372  
373 Having examined the behavior of passive fibrin networks, we next sought to examine the  
374 differences in the interaction of platelets with crosslinked and uncrosslinked fibrin  
375 networks. The differences in platelet morphology and fiber distribution around the  
376 platelets are highlighted in **Fig. 4A**. As shown in the inset for the PRP clot, the fibers are  
377 more uniformly oriented around the platelet cluster, which then extend filopodia along  
378 these fibers, resulting in a more isotropic configuration. In contrast, the T101-treated (i.e.,  
379 uncrosslinked) PRP clot exhibits irregular distribution of fibers around the platelet  
380 aggregate, lacks filopodia, and has more anisotropic morphology. It is well-known that  
381 platelets exert contractile stress on vicinal fibrin fibers shortly after initiation of the clot  
382 which reaches a steady state as the clot is stabilized (50). Thus, while the local mechanical  
383 deformations of the fibrin network cannot be quantified as yet, the organization of fibers  
384 and filopodia are expected to be correlated with local strains.

385  
386 To connect the fiber distribution and platelet morphology to local deformations, we  
387 simulated the response of the elastic network to active contraction, by introducing actively  
388 contractile platelets into the passive fibrin network (see *Methods* for details).  
389 Uncrosslinked and crosslinked active networks were modeled by modifying the bending-  
390 to-stretching stiffness ratio, represented by the stiffness factor,  $k$ . Our previous  
391 experimental estimate of about 140 platelet aggregates/mm<sup>2</sup> in a cross-section of  
392 contracted clots (5) was used to seed the network with ~70 active nodes in the simulation  
393 box size which corresponds to an area of 0.5 mm<sup>2</sup>. The contractile forces exerted by the  
394 platelet aggregates were obtained from published estimates from micropost measurements  
395 as ~30 nN (51). The contractile prestress exerted by the platelets on the fibers manifests as  
396 an increase in the stiffness of PRP clots compared to PPP clots. The gelation kinetics  
397 showed that the presence of platelets increased the stiffness of clots even at the onset of  
398 gelation (**Fig. S1**). In fully formed clots, platelets increased the shear modulus of the  
399 plasma clots by threefold, while a twofold increase due to platelets was also seen in  
400 uncrosslinked clots.

401  
402 In our active network model for PRP clots, the platelet aggregates are modeled as isotropic  
403 force dipoles that continuously generate contractile force. This is realized in the  
404 simulations by reducing the reference length of bonds attached to the active nodes,  
405 representing platelet aggregates. The equilibrium configuration is then achieved when the  
406 forces exerted by the platelets are balanced by equal and opposite elastic restoring forces  
407 from the bonds representing fibrin fibers. The simulation results showed that the platelet  
408 contraction does not increase the strain uniformly in all fibers but only in some, which  
409 together form an interconnected subnetwork of stretched fibers highlighted in blue (**Fig.**  
410 **4B**). We observed a denser subnetwork for fibers with higher bending rigidity, i.e.,  
411 corresponding to crosslinked fibers. In case of uncrosslinked fibers with lower bending  
412 rigidity, the high-strain subnetwork is sparse, and appears as a few long and connected  
413 chains. This difference is again because more bonds can easily rotate to relax their tension  
414 at lower values of  $k$ . The subnetworks of stretched fibers or “force chains” originate from  
415 and extend to distant platelet aggregates, and thus serve as conduits for the transmission of  
416 forces exerted by the platelets. Consequently, the crosslinked PRP clots which are made of  
417 fibrin fibers with high bending rigidity and denser force chains, are expected to contract  
418 more than the uncrosslinked clots (28).

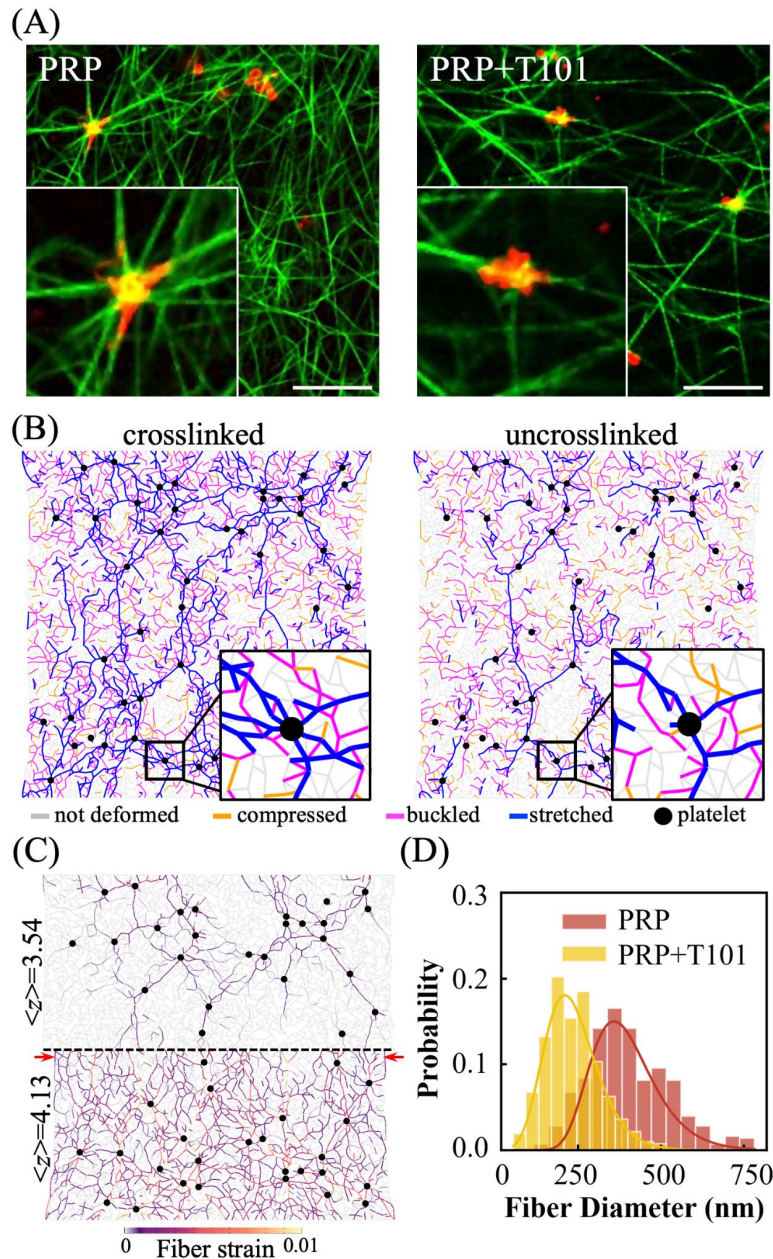

**Fig. 4. Fibrin crosslinking is critical to platelet-fibrin interactions and to the formation of force chains.**

(A) Fluorescence microscopy images of platelet-rich plasma (PRP) clots with crosslinked fibrin (*left*) and with T101 inhibition of crosslinking (*right*). Insets clearly show that fibrin (green) distribution is more uniform around platelets (red) in the crosslinked clots, with the platelets also showing a more isotropic morphology with pronounced filopodia in these cases. The empirical observations are consistent with model prediction of higher densification for more stretched crosslinked fibers. Scale bar: 100  $\mu\text{m}$  (B) Model network simulations show the heterogeneous distribution of forces around actively contractile nodes representing platelets (black). The stretched fibers (blue) form “force chains” that propagate from one platelet to another and are sparser and more localized in the uncrosslinked network (*right*). (C) Force chains are significantly denser and longer-ranged in over-coordinated ( $\langle z \rangle > 4$ ) than under-coordinated networks ( $\langle z \rangle < 4$ ). In both cases of lower bending stiffness ( $k$ ) and lower  $\langle z \rangle$ , there are many energetically favorable bending modes available, which lead to reduced fiber stretching. This in turn will lead to reduced force propagation to the network boundary, predicting an anomalous effect of less macroscopic contraction in softer networks (where the retraction difference is shown by red arrows). (D) Quantification of apparent fiber diameter around platelet clusters ( $n = 4$  donors; 70 fibers per sample). Thus, inhibition of crosslinking by T101 treatment of PRP clots leads to thinner fibers around platelets. This suggests less bundling of fibers and weaker platelet-fibrin interactions.



440 Importantly, and for the same underlying reason as networks with stiffer bending (high  $k$ ),  
441 networks with higher coordination number also exhibit denser force chains (**Fig. 4C**). The  
442 availability of low energy bending modes in under-coordinated networks (lower  $\langle z \rangle$ ),  
443 causes the stress generated by platelet aggregates to be localized only along a few force  
444 chains. In denser networks at larger average coordination number  $\langle z \rangle$ , stresses propagate  
445 more uniformly throughout the network (more fibers under strain), and as a result, the  
446 range of force transmission and bulk network contraction is expected to be larger. The  
447 difference in the range of stress propagation is qualitatively seen at the midline of the  
448 network depicted by the dashed black line in **Fig. 4C** (only mirror halves of networks are  
449 shown). Clearly, many more force chains reach the midline for the higher  $\langle z \rangle$  case. We  
450 chose  $\langle z \rangle = 4.13$  in the simulation for representational purposes to show this marked  
451 contrast, although we do not expect fibrin networks to exhibit an average coordination  
452 number greater than 4. Although it is difficult to directly quantify from experimental  
453 images how the coordination number of fibrin networks in clots changes upon T101  
454 treatment, it is plausible that crosslinker inhibition may reduce the number of branch  
455 points along with the bending stiffness at these branchpoints. Thus, our model predicts  
456 that crosslinker inhibition will lead to fewer force chains, less efficient transmission of  
457 forces in the network, and less overall retraction of the clot. This behavior can be  
458 detrimental to the strength and stability of fibrin networks, and can lead to clot failure.  
459

460 To elucidate the fiber redistribution around platelets revealed by the experimental  
461 micrographs (insets in **Fig. 4A**), we focus on the force chains around active nodes shown  
462 for the simulated networks as insets in **Fig. 4B**. The fibers directed radially outwards from  
463 the active nodes transmit the highest tensile strain (blue), while those along the azimuthal  
464 direction tend to be compressed, and then buckled (purple). The stretched fibers are more  
465 numerous for the higher  $k$ -network, as expected, due to larger bending and buckling  
466 resistive forces from other fibers. In contrast, simulations show fewer force chains for the  
467 network with lower  $k$ , which travel along fewer directions. To relate this observation to  
468 experiments, we quantified in **Fig. 4D** the apparent diameter of fibers around the platelet  
469 aggregate using images such as in **Fig. 4A**. These fibers close to platelets were found to be  
470 thicker in the crosslinked case, with mean and standard deviation values of  $402 \text{ nm} \pm 126$   
471  $\text{nm}$  for PRP clots and  $236 \text{ nm} \pm 81.5 \text{ nm}$  for PRP clots treated with T101 ( $n = 4$  donors  
472 with about 70 fibers per donor;  $P < 0.001$ , two-tailed t-test). Our model predictions for the  
473 force distribution around platelets (**Fig. 4B**) suggests a plausible explanation for this  
474 observation. The more numerous force chains that develop between two nearby platelet  
475 aggregates in the stiffer crosslinked networks, can lead to the alignment and bundling of  
476 fibers between them, which may be further stabilized by FXIII-A-mediated lateral  
477 crosslinking. Contractile cells (fibroblasts) in fibrin gels have been shown to form such  
478 densified and aligned bands of fibers around them, through which they mechanically  
479 interact (17). For uncrosslinked fiber networks, our model suggests that there are fewer  
480 force chains between platelet aggregates, which will therefore lead to weaker bundling of  
481 the fibers and lower effective fiber diameter, as observed. This hypothesis is further  
482 supported by the observation that the diameter of the fibers far from the platelets is  
483 comparable between crosslinked and uncrosslinked clots, demonstrating that platelet  
484 activity was responsible for fiber bundling (52),(53). Altogether, the results in **Fig. 4** show  
485 that inhibition of fibrin crosslinking strongly impacts the active remodeling of the  
486 surrounding fibrin network by platelets.  
487



## Active stiffening is dependent on magnitude of shear stress and extent of crosslinking

Next, we examined the mechanical response of crosslinked and uncrosslinked PRP clots to shear stress (**Fig. 5A**). PRP clots were prepared between the plates of a rheometer, allowed to gel, and then subjected to shear. To simulate this process, we first allowed the model networks to contract under active forces, as described in the previous section, but now with nodes on the network boundary held fixed. Subsequently, these clots were subjected to shear strain as described previously for PPP clots, but now with randomly placed “active nodes” representing platelet aggregates that actively pull on the fiber network. The PRP network simulation results capture the experimental results with the same coordination number as the passive networks ( $\langle z \rangle = 3.84$ ), but with a modest increase in the bending stiffness parameter,  $k$ . This may indicate that fibers become stiffer to bend in the presence of platelets, possibly through platelet-induced crosslinking. The comparable estimates of model parameters in the passive and active networks from the low and moderate shear regimes, suggest that platelets at this density primarily modify the mechanical prestress in the network, and not its connectivity  $\langle z \rangle$  or fiber structure. Overall, the response of PRP clots is similar to PPP clots, and shows a stiffening transition at large strains. However, unlike PPP clots, platelets not only stiffen the network but also cause a softening dip of different magnitudes in both crosslinked and uncrosslinked networks (**Fig. 5A**). The softening regime in PRP clots occurs at about the same strains as in PPP clots, and is also more pronounced in the uncrosslinked networks.

To gain qualitative insight into the different regimes of the shear modulus vs shear stress curves in **Fig. 5A**, we show representative snapshots of the simulated active networks at low and high strains in **Fig. 5B**. Individual network bonds are colored to show their deformation state, i.e. whether it is stretched (blue), compressed (yellow) or buckled i.e. compressed beyond the critical strain (magenta). Unlike similar snapshots for networks without platelet contraction shown previously in **Fig. 3A**, these networks have considerable stretched and buckled bonds even at the very low strain value of 1%, due to the prestress induced by platelets. The number of stretched bonds increases rapidly with applied stress, because the prestress pulls out floppy bending modes. The corresponding bending-to-stretching stiffening transition happens at lower applied strains in the presence of platelets both in uncrosslinked (**Fig. S4A**) and crosslinked networks (**Fig. S4B**), as a result of this. The force chains propagating from the platelets intensify with applied strain (**Fig. 5B**), but they remain more localized to the paths connecting platelets in uncrosslinked networks. The effects of both crosslinking and platelet prestress are eliminated in the stretching dominated regime at larger strains, e.g. at 30%. Similarly to **Fig. 3B** for networks without platelets, we now consider in **Fig. 5C** the relative contributions to elastic energy density of the different deformation modes. We observe two distinct differences between active networks with platelets and passive networks without platelets (**Fig. 3C**). First, the platelet-induced prestress creates an initial plateau of energy for all deformation modes at low applied strain. In this initial regime, the effect of the platelet prestress dominates that of the applied stress. Second, unlike passive networks which have predominantly bending modes at low strains, the platelets induce compression and buckling with energies comparable to that of bending (**Fig. 5C**). While the crosslinked network at larger  $k$  (*left*) still has a bending-dominated regime (**Fig. 5C**), this regime does not appear in the uncrosslinked, lower  $k$  network (*right*). The absence of this regime is again due to platelets, which are more effective at pulling out floppy modes in uncrosslinked networks that have smaller bending forces.

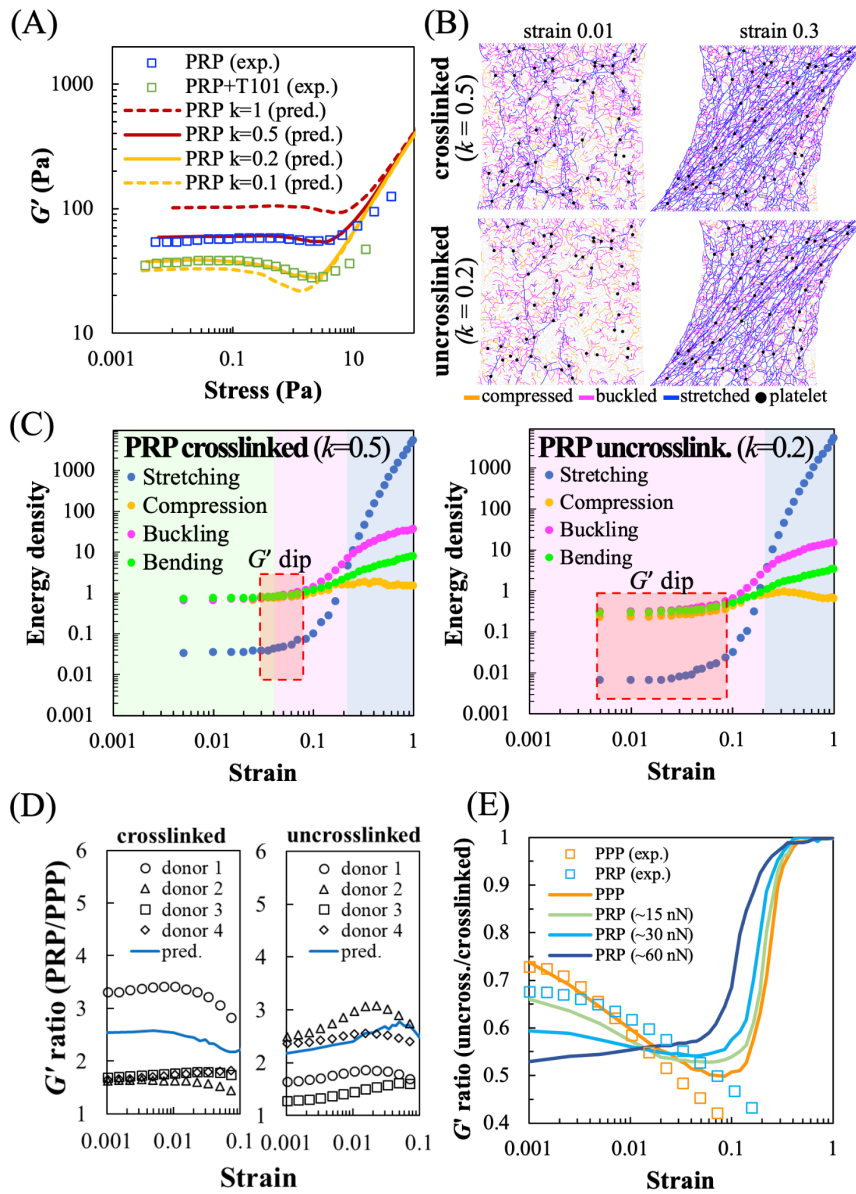

**Fig. 5. Shear stiffness of active networks representing platelet rich plasma (PRP) clots.** (A) Shear modulus ( $G'$ ) vs. applied stress for PRP clots (squares), with and without T101, and for simulated networks (lines) at  $\langle z \rangle = 3.84$ , ~30 nN initial platelet contractile force, and different values of the reduced fiber bending stiffness parameter,  $k$ . Uncrosslinked PRP clots demonstrate a pronounced softening dip, unlike PPP. (B) Simulation snapshots of network deformation vs. strain, with individual bonds colored by strain. The number of stretched bonds is high due to platelet-generated prestress and increases further with applied shear strain. (C) Calculated elastic energy density, corresponding to the different deformation modes, as a function of applied strain in simulations. The colored regions indicate the deformation mode that is the largest contributor to the total energy, while the red dashed box indicates the region where the softening dip is observed in the shear modulus in (A). (D) Ratio of shear moduli of PRP to PPP clots at different applied shear strains, shown for four different donors (data points) and corresponding simulations (line), for both crosslinked (left) and uncrosslinked (right) cases. Thus, platelets stiffen the network by different amounts depending on applied shear. The stiffening factor decreases gently with strain for crosslinked networks while for uncrosslinked networks, it increases with strain up to a maximum at 6%. (E) Ratio of shear moduli of uncrosslinked to crosslinked networks in simulations (lines) for different values of platelet contractility (initial force values shown), and correspondingly, ratio of measured shear moduli of T101-treated to untreated clots (squares). Strongly contractile platelets (~60 nN) amplify the difference and show different behavior vs. strain.

559 While it is expected that platelets will stiffen the fibrin network by introducing prestress,  
560 we next examine the magnitude of this stiffening. The stiffening effect of platelets on clots  
561 is seen in terms of the ratio of the shear modulus  $G'$  for PRP to PPP, shown separately for  
562 uncrosslinked and crosslinked networks (**Fig. 5D**). Both the measurements for individual  
563 donors (discrete markers) and the model calculations (solid line) show a significant  
564 increase (about twofold to threefold) in shear modulus produced by platelets. Interestingly,  
565 the stiffening is shear-dependent for both crosslinked and uncrosslinked networks. In  
566 crosslinked networks, the stiffening due to platelets is most appreciable at low strains, and  
567 decreases weakly with strain. On the other hand, this stiffening in uncrosslinked networks  
568 exhibits a noticeable maximum at intermediate shear. This is consistent with the model  
569 prediction that platelets stiffen most at strains where the maximum softening dip in  $G'$   
570 occurs for PPP (~6%). By pulling on the surrounding fibers, platelets stiffen the network  
571 through a reduction in the number of floppy, low-energy bending modes. In the high strain  
572 regime, however, the applied external force becomes much larger than the force generated  
573 by platelets. Thus, at high strain PPP and PRP clots should have the same value (i.e.,  $G'$   
574 ratio trending toward 1). To summarize, the results in **Fig. 5D** indicate that platelet-fibrin  
575 interactions depend on both the amount of applied stress and the fiber bending stiffness  
576 associated with fibrin crosslinking. The larger stiffening effect of platelet-generated  
577 prestress in uncrosslinked networks suggests that prestress may serve as a compensating  
578 mechanism for restoring clot stiffness in the absence of crosslinking. The platelets are  
579 most effective and provide sufficient clot stiffening at small and moderate strains (up to  
580 10% strain), which may be physiologically relevant at early stages of clot formation.

581  
582 To examine the effect of prestress due to platelets on networks with and without  
583 crosslinking, we plot the ratio of shear moduli of uncrosslinked to crosslinked clots  
584 predicted from simulations, at different values of platelet contractility (**Fig. 5E**). The  
585 corresponding shear moduli for simulated networks at higher and lower bending stiffness,  
586 are shown in **Fig. S4D and S4E**. Unlike PRP clots, the PPP data (orange squares) show  
587 closer agreement with simulations (orange line) at low-to-intermediate strain (<10%). This  
588 suggests that platelets induce strain-dependent changes to network mechanics, which are  
589 not fully captured by our simple model which does not strictly control platelet  
590 contractility. In the simulation curves in **Fig. 5E**, all ratios start less than 1 in the bending-  
591 dominated low strain regime, and approach 1 at much higher strain values where  
592 stretching dominates and the differences in  $k$  are not relevant. In the intermediate regime,  
593 the shear moduli ratio is sensitive to the contractile forces generated by platelets. For  
594 platelets with weaker contractile forces (half the estimated initial value, ~15 nN (51)), the  
595 pronounced dip in the  $G'$  vs. strain curves for uncrosslinked networks leads to an initial  
596 decrease and subsequent increase in this ratio. However, stronger platelet contraction  
597 (double the estimated initial value, ~60 nN) shows greater softening for the uncrosslinked  
598 networks before external shear is applied. Additionally, platelets with higher contractility  
599 express a softening dip in the  $G'$ -vs-strain curves for both crosslinked ( $k = 0.5$ ) and  
600 uncrosslinked ( $k = 0.2$ ) networks (see **Fig. S4D and S4E**). This behavior is different from  
601 networks with lower platelet contractility which show a pronounced softening dip only at  
602 lower  $k$  values. The stronger platelets soften the network more when crosslinking is  
603 inhibited at small strains than at intermediate strains. Taken together, the simulation  
604 curves in **Fig. 5E** show that the manner in which platelet contractility influences modulus  
605 (specifically the  $G'$  ratio for uncrosslinked vs. crosslinked fibers) is dependent on the  
606 magnitude of strain. This may arise due to the adaptive dependence of platelet contractile  
607 force on network stiffness (54), through which platelets possibly exert lower initial force,  
608 e.g. 15 nN, at low strains (below 1%), and exert higher force at intermediate strains (1% to

609 10%). Such mechano-adaptation is typical in contractile cells that exert greater traction  
610 force when the extracellular environment is stiffer. Additionally, we note that the  
611 simulation curves predict a crossover in the ratio of shear moduli where these values  
612 become identical for networks at different contractility (~2%). This crossover change in  
613 slope—seen in both simulation and experimentation—suggests that there is a strong  
614 interaction effect between platelet force and magnitude of strain.

## 615 616 **DISCUSSION**

617  
618 In this work, we combined modeling and experiments to characterize the macroscopic  
619 mechanical responses of crosslinked and uncrosslinked plasma clots to shear strain in the  
620 presence and absence of active prestress induced by platelets. To understand the  
621 micromechanical origins of these responses, we resolved the contribution of individual  
622 fiber deformations to the overall mechanical behavior using a minimal elastic network  
623 model parameterized from experiments. Our results show that the network response at  
624 various shear strains is dominated by different deformation modes of individual fibers, and  
625 depends on fiber crosslinking, network connectivity, and platelet contraction-induced  
626 network prestress. Our model predicts that the experimentally observed unusual shear  
627 softening transition occurs due to the propensity of uncrosslinked fibers to buckle and  
628 bend rather than to be stretched or compressed. Our model can thus capture the effect of a  
629 biochemical perturbation-induced change in fiber structure through a single coarse-grained  
630 parameter ( $k$ ) corresponding to fiber buckling and bending, thereby linking molecular  
631 scale structure to a continuum mechanical property (42).

632  
633 While the rheology of fibrin gels are well characterized (55), understanding the physical  
634 mechanisms governing behavior of plasma clots, particularly the effects of fiber  
635 crosslinking and platelet-induced contraction, remains elusive. Fibrin gels stiffen under  
636 increasing shear, although the extent and nature of stiffening vary depending on the  
637 polymerization conditions. Consistent with previous reports, we show that fibrin gels and  
638 PPP clots transition from linear response characterized by a constant shear modulus to  
639 shear-dependence at ~10% strain or at a stress of ~1 Pa (56),(57)]. This strain-stiffening  
640 phenomenon is well-established in other biopolymer networks such as actin and collagen  
641 (10) and in fibrous networks in general (58). These typically comprise semiflexible  
642 polymers that show nonlinear force-extension curves with stiffening under tension which  
643 pulls out thermal fluctuation modes, and softening under compression. Semiflexible  
644 polymer networks are expected to stiffen according to a specific power law with shear  
645 stress,  $G' \sim \sigma^{3/2}$  (59), as has been demonstrated in the case of crosslinked actin gels (60).  
646 Strain-stiffening may also arise as a collective effect in athermal fiber networks, due to the  
647 purely geometric effect of strain-induced fiber alignment (61), as well as the strain-  
648 induced transition from a bending-dominated to stretching-dominated response in under-  
649 coordinated networks (45). To investigate the nonlinear strain-response regimes of plasma  
650 clots, we developed and compared experiments with a general, enthalpic model of fibrin  
651 networks wherein the network mechanics is governed by the bending, buckling, and  
652 stretching modes of the constituent fibrin fibers (37). At higher strains where clot rupture  
653 occurs, the irreversible dissociation of bonds between fibrin monomers might become  
654 more important, but we ignore this effect in our model since we aim to capture  
655 experiments at low to intermediate shear where network response remains reversible and  
656 elastic (62).  
657



658 The agreement between model predictions and experimental measurements of shear  
659 modulus at different applied strains demonstrates that the bending and buckling modes of  
660 fibers are important for describing the shear response of fibrin networks. Individual fibrin  
661 fibers buckle as much as one-third their unstrained length under compression, and they  
662 stretch nearly two times their original length under tension (63),(23). Under compression,  
663 clots may expel fluid leading to poroelastic effects that are not considered in the present  
664 model (64). We focus here on the elastic response of the clots and not plastic or possible  
665 viscoelastic effects which are undeniably important for understanding the full regime of  
666 clot dynamic behavior. Elastic energy calculations show that the mechanics of the network  
667 are governed by bending, buckling, and stretching with the dominant mode strongly  
668 dependent on applied strain. The rate of growth of constituting elastic energies with strain  
669 exhibit different regimes characterized by different power laws that depend on the  
670 bending/buckling stiffness parameter,  $k$ . With increase in applied strain, two distinct  
671 transitions in predominant modes of deformation occur, namely bending-to-buckling, and  
672 buckling-to-stretching. The latter is manifested as an abrupt increase in  $G'$  independent of  
673 crosslinking, and this transition is well-documented as the strain-stiffening response of  
674 biopolymer networks (13). Although softening of fiber networks has been reported in  
675 simulations (47),(48) in this work we provide the first experimental proof of this effect in  
676 crosslinking-inhibited plasma clots and also show that this arises from the bending-to-  
677 buckling transition which occurs at low strains. This effect may be a broader phenomenon:  
678 recent rheological measurements of clots from rats (65) reported a significant decrease in  
679 shear modulus with increasing shear deformation, although the mechanistic or mechanical  
680 basis of such softening response was not investigated. Here, by comparing the mechanics  
681 of uncrosslinked and crosslinked PPP networks, we show that the atypical softening-  
682 stiffening behavior of uncrosslinked fibers originates from a bending to buckling-  
683 dominated response, which softens a fraction of the fibers originally under compression.

684  
685 We explored heterogeneous force transmission in the elastic network subjected to  
686 externally applied shear or due to internal platelet contraction. Our simulations show that  
687 the fibers transverse to the direction of external load are under compressive stresses and  
688 they eventually bend and buckle; while fibers longitudinal to the direction of external load  
689 are under tension and get stretched. This orientational anisotropy gives rise to spatial  
690 heterogeneity in microscale stress distributions which govern their overall behavior  
691 including non-linear stiffness and tendency to rupture (66),(67). The local heterogeneity in  
692 strain distribution also manifests as disordered patterns of force transmission through  
693 tensile force chains (17),(18),(68). Force chains are believed to be the conduits for long  
694 range force transmission between contracting cells in fibrous materials (69). Unlike  
695 previous models that considered only fiber buckling in the analysis of force chains that  
696 develop between contractile cells in fiber networks (24),(70), here we include both  
697 bending and buckling of linear elastic fibers in our modeling, and show that bending  
698 screens out long-range propagation of strains in the network. We thus find that the  
699 decrease in bending stiffness of fibers results in fewer force chains that extend through the  
700 network. Likewise, we observed more numerous and longer force chains connecting  
701 platelets in higher bending stiffness networks corresponding to crosslinked fibrin. We  
702 connect this to the experimental observation of thicker aligned bundles of fibers around  
703 platelets in a crosslinked fibrin network, and a more isotropic and well-spread platelet  
704 shape. Lastly, our analysis suggests that a lack of sufficient number of force chains may  
705 result in an inability to transmit the contractile forces generated by platelets in  
706 uncrosslinked PRP clots, which provides an explanation for our previous experimental  
707 observation that T101-treated PRP clots failed to generate measurable contractile force

708 (28). Thus, we predict anomalous elastic behavior in contracting networks: stiffer fibers  
709 result in greater contraction under internal active stresses, which is counter-intuitive when  
710 compared with a solid under external compression.

711  
712 Importantly, we have investigated the response of the fibrin networks to shear stresses  
713 which are well within physiological and pathophysiological ranges: the wall shear stresses  
714 in blood vessels range widely between 0.1 Pa (in veins) to 10 Pa (in stenosed arteries and  
715 arterioles) (30); indirect estimates of stresses at various regions of blood clots are reported  
716 to vary widely between 0.1 to >100 Pa (71),(72); and the shear stresses experienced by  
717 thrombi may increase by several fold during stenosis (73) or due to local variations in clot  
718 porosity (74). Therefore, the increasing stiffness beyond 2 Pa may serve to mitigate  
719 spontaneous mechanical damage to the clots in regions of high shear stress. Strain  
720 stiffening of fibrin networks is a remarkable phenomenon that may have evolved to  
721 maintain the integrity of blood clots and fibrin sealants under large deformation such as  
722 when exposed to shear stresses due to blood flow.

723  
724 The implications of our findings at stresses lower than 2 Pa might be particularly  
725 important at earlier stages of clot formation. Stresses below 2 Pa arise not only in slower  
726 blood flows but also in the remodeling of fibrin networks during cell contraction (75). At  
727 these low shear stresses, we noticed qualitatively different behaviors of crosslinked and  
728 uncrosslinked PPP clots (**Fig. 2**), and the maximum shear stiffening effect of platelets on  
729 uncrosslinked, but not on crosslinked, PRP clots (**Fig. 5**). Of consideration is the timing of  
730 FXIII-A-mediated crosslinking in the formation of mature, fully contracted clots. Since  
731 the formation of laterally aggregated protofibrils always precedes their crosslinking,  
732 weakly compacted and uncrosslinked bundles of protofibrils are simultaneously  
733 remodeled by FXIII-A and by platelets (76),(77). The pronounced softening of  
734 uncrosslinked fibers observed in our experiments suggest that strain-dependent stress  
735 propagation through these fibers will impact the final clot structure. Our results also  
736 suggest that softer fibers easily bend and buckle under compression, which makes them  
737 acquiescent to easy rearrangement but not to long-range force transmission, indicating a  
738 location-dependent remodeling in evolving clots. Hence, the timing and extent of FXIII-  
739 A-mediated crosslinking dictates clot structure not only through the direct modification of  
740 fiber thickness and branching but also by altering the trajectory of the stiffness landscape.

741  
742 Overall, we have described a general elastic network model that incorporates platelet  
743 activity, and can accurately capture the shear response of PPP and PRP clots. The model  
744 accounts for different fiber deformation modes (stretching, compression, bending, and  
745 buckling), the extent of fibrin crosslinking, and the contractility of platelets. We have also  
746 described a potentially overlooked softening regime in fibrin networks at intermediate  
747 shear, before the well-known onset of strain stiffening. The softening is shown to arise due  
748 to reduction in bending stiffness of uncrosslinked fibers and a delayed bending-to-  
749 buckling transition. This softer regime may arise in early stages of clot formation,  
750 allowing for greater restructuring by platelets. Lastly, we show that crosslinking also  
751 modulates the distribution of prestress imposed on the network by platelet contraction, and  
752 changes the deformation modes of the network to applied shear. Our work provides  
753 biophysical insights into how mechanical cues from the fibrin network, external stress and  
754 platelet contraction work together to modulate macroscopic clot stiffness, and provokes  
755 the possibility of adaptive mechanical regulation in the clotting process.  
756

## 757 MATERIALS AND METHODS

### 758 Experimental methods

#### 759 Isolation of platelet rich plasma (PRP) and platelet poor plasma (PPP)

760  
761  
762  
763 Blood was obtained by phlebotomy from healthy volunteers between 20 to 30 years of age  
764 who did not have any chronic conditions or medications known to alter platelet function  
765 (San José State University IRB protocol F16134). The blood was drawn in vacutainer  
766 tubes containing 3.2% buffered sodium citrate (BD Biosciences, San Jose, CA, USA). The  
767 blood was centrifuged at 250 RCF (relative centrifugal force) and 7 rad/s<sup>2</sup> acceleration for  
768 20 min (5810 R, Eppendorf, Hamburg, Germany). The platelet rich plasma (PRP)  
769 supernatant was separated from the red blood cell (RBC) sediment. To obtain platelet poor  
770 plasma (PPP), 10 μM PGI<sub>2</sub> (Sigma) was added to PRP, and was further centrifuged at 600  
771 RCF and 9 rad/s<sup>2</sup> acceleration with brakes for 15 min. The supernatant PPP was separated  
772 from the platelet pellet. For rheometry experiments, the PRP and PPP were used within 4  
773 and 6 h of isolation, respectively.  
774

#### 775 Shear rheometry of PRP and PPP clots

776  
777 Shear experiments were executed on 600 μL of PRP or PPP mixed with 1 U/mL thrombin  
778 (Enzyme Research Laboratories, South Bend, IN, USA) and 20 mM CaCl<sub>2</sub> (Millipore  
779 Sigma, St. Louis, MO, USA) subjected to shear strain at 22 °C in rheometer in two stages  
780 (MCR 302, Anton Paar, Graz, Austria). First, a small amplitude oscillatory test at low  
781 strain (0.5%) and 1 Hz was applied for 45 min. Second, after clot gelation, shear strain  
782 was progressively increased from 0.001% to 250% at a constant frequency of 1 Hz. The  
783 shear stress and shear modulus were recorded. To prevent evaporation, a thin immiscible  
784 oil layer (Vapor-Lock liquid vapor barrier, QIAGEN, Valencia, CA, USA) was applied  
785 along the rim of the clot, and the set-up was covered with a humidifying chamber. For  
786 experiments involving inhibition of factor XIII (FXIII-A)-mediated crosslinking, 100 μM  
787 of T101 (Zedira GmbH, Darmstadt, Germany) was added to PRP or PPP before  
788 performing the experiments.  
789

#### 790 Clot microstructure

791  
792 To prepare PRP clots for visualization, 100 μL of PRP was incubated with 1 μg/mL  
793 AF647-conjugated CD42b rabbit anti-human antibody (BioLegend, San Diego, CA, USA)  
794 to label the platelets, and 1% AF488-conjugated fibrinogen (BioLegend, San Diego, CA,  
795 USA) to label fibrinogen for 10 min on a rocker with gentle rocking frequency of  
796 approximately 2 Hz (Vari-mix Platform Rocker, Thermo Fisher Scientific, Waltham, MA,  
797 USA). After incubation, clots were prepared by adding 20 mM CaCl<sub>2</sub> and 0.2 U/mL  
798 thrombin. Immediately, 50 μL of the mixture was added on ethanol-cleaned 1 mm  
799 microscope slides (Thermo Fisher Scientific, Waltham, MA, USA). PPP clots were  
800 prepared in a similar fashion but without the platelet antibody. The clots were imaged by  
801 confocal microscopy with an Apochromat 63X oil objective with a vertical stack interval  
802 of 1 μm (Zeiss LSM 700). The images were analyzed using Imaris v9.5 (Oxford  
803 Instruments, MA), and NIH ImageJ (78).  
804  
805

## 806 Computational model

### 807 Network model setup

808 The initial network was generated with Delaunay triangulation in a two-dimensional  
 809 square domain using the software tool Gmsh (79). The triangulated network had an  
 810 average spacing  $l_0 = \langle l_{ij} \rangle$  between neighboring nodes  $i$  and  $j$ , and consisted of about 5000  
 811 nodes arranged in a box of size  $70 \times 70$  node spacings. The initial network configuration  
 812 without platelets is assumed to be stress free. Each bond in the network is then at its rest  
 813 length,  $l_{ij}$ , and each junction at its rest angle,  $\theta_{ijk}$  initially (**Fig. 1A**). The average node  
 814 spacing was set to correspond to the approximate average branch length,  $10 \mu\text{m}$ , typically  
 815 seen in experimental images. Image analysis based on fluorescence microscopy showed  
 816 no significant difference between fiber lengths for clots with and without the T101  
 817 crosslinking inhibitor (**Fig. S3**). The coordination number was varied by randomly  
 818 removing a fraction of bonds in the initially fully coordinated network. To prevent  
 819 dangling bonds, the coordination number at each connecting node was not allowed to be  
 820 smaller than 3. The probability of a bond being present,  $p$ , determines the average network  
 821 coordination number  $\langle z \rangle$ . To increase the network irregularity, the position of each node  $x_i$   
 822 was additionally perturbed by a small random displacement,  $\delta x_i = 0.1 \eta l_0$ , where  $\eta$  is a  
 823 uniformly distributed random number from the interval  $[-1, 1]$ . The active nodes  
 824 representing platelets were randomly placed throughout the mesh to reach a typical  
 825 platelet seeding density. To prevent large local deformations in the network caused by  
 826 locally biased density or a lack of connected fibers at the boundary, active nodes were not  
 827 allowed to be at the boundary and two platelets were not allowed to share the same bond.  
 828  
 829  
 830

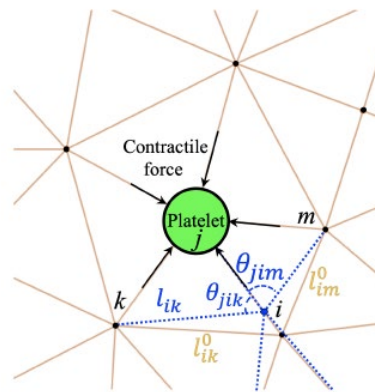

831  
 832  
 833 **Fig. 6. Geometry of the elastic network model.** The model comprises uniform spring-like bonds connected  
 834 at nodes of different coordination. Some nodes are “active” and represent aggregates of platelets generating  
 835 contractile forces on connected fibers. Under the action of active nodes and applied strain, the initial rest  
 836 configuration (yellow bonds) deforms to a new stressed configuration (blue bonds) by displacing connected  
 837 nodes. This deformation is associated with changing fiber’s end-to-end lengths (stretching/compression) and  
 838 changing the angles between bonds (bending). Both these deformation modes result in an elastic restoring  
 839 force on the concerned node. The calculated forces lead to the overdamped dynamics of the node towards  
 840 the mechanical equilibrium state where all forces are balanced.  
 841



842 Network model dynamics

843  
844  
845  
846  
847

The dynamics of the simulated network mimics the inertia-free, and viscous dominated clot dynamics. Thus the position of each node in the network was updated following equations for noise-free and overdamped dynamics designed to find the mechanical equilibrium state,

$$\gamma \frac{d\vec{x}_i}{dt} = \vec{F}_i^{stretching} + \vec{F}_i^{bending} + \vec{F}_i^{buckling} \quad (1)$$

848  
849  
850  
851

where  $\gamma$  is the drag coefficient arising from friction due to the surrounding viscous medium, and the total force acting on the  $i^{th}$  node includes contributions from bond stretching, bonds bending i.e. changing their relative orientation at junctions, and bond buckling forces, given by

$$\vec{F}_i^{stretching} = \mu \sum_{\langle j \rangle} \Theta(\epsilon_{ij} - \epsilon_{cr}) \epsilon_{ij} \hat{l}_{ij} \quad (2a)$$

$$\vec{F}_i^{bending} = \frac{\kappa_b}{l_0^2} \sum_{\langle jk \rangle} \sin \frac{\delta\theta_{jik}}{2} \hat{n}_i \quad (2b)$$

$$\vec{F}_i^{buckling} = -\frac{\kappa_f}{l_0^2} \sum_{\langle j \rangle} \Theta(\epsilon_{cr} - \epsilon_{ij}) f(\epsilon_{ij}) \hat{l}_{ij} \quad (2c)$$

852

853  
854  
855  
856  
857  
858  
859  
860  
861  
862  
863  
864  
865  
866  
867  
868  
869  
870  
871  
872

Here,  $\mu$  is the stretching modulus of individual bonds,  $\kappa_b$  is the bending modulus at junctions between two bonds which penalizes change in the bond angle and can include contributions both from the entanglement between neighboring fibers, as well as the bending of individual fibers.  $\hat{l}_{ij}$  represents the unit bond vector connecting the  $i^{th}$  to the  $j^{th}$  node, and the strain in this bond is given by  $\epsilon_{ij} = (l_{ij} / l_{ij} - 1)$ , where  $l_{ij}$  is the actual bond length, and  $l_{ij}$  is the target rest length. The direction of the bending force is along  $\hat{n}_i = (\hat{l}_{ij} + \hat{l}_{ik}) / |\hat{l}_{ij} + \hat{l}_{ik}|$ . The buckling force arises when the critical compressive strain is exceeded, i.e.  $\epsilon < \epsilon_{cr}$ , and opposes the compression. It scales with the bending modulus of an individual fiber,  $\kappa_f$ , and is a nonlinear function of compressive strain,  $f(\epsilon_{ij})$  (80). The Heaviside function  $\Theta$  takes the value  $\Theta = 1$  when its argument is positive, and  $\Theta = 0$  in the other cases, and therefore, determines if the fiber is stretched, compressed or buckled. In our model, we do not calculate the bent shape of the fibers, but instead model the effect of buckling as a force that resists compression, with an effective modulus that is much smaller than the stretching modulus,  $\mu$ . Further, while the bending stiffness of individual fibers  $\kappa_f$  can be different in principle from the bending stiffness  $\kappa_b$  at a branch point between two fibers, we assume them to be equal  $\kappa_b = \kappa_f = \kappa$  because they both have contributions from the same underlying molecular crosslinking. This “equal constant” approximation reduces the number of free parameters in the model. In **Fig. S4F**, we consider the effects of having different values of buckling and bending stiffness.

873  
874  
875

By choosing the length scale as  $l_0$ , force scale as  $\mu$ , and time scale as  $\gamma l_0/\mu$ , the dynamical equation (obtained by combining equation 1 with equations 2a-2c) can be rewritten in nondimensional form as

$$\frac{d\vec{x}_i^*}{dt^*} = \sum_{\langle j \rangle} \Theta(\epsilon_{ij} - \epsilon_{cr}) \epsilon_{ij} \hat{l}_{ij} + \left( \frac{\kappa}{\mu l_0^2} \right) \sum_{\langle jk \rangle} \sin \frac{\delta\theta_{jik}}{2} \hat{n}_i - \left( \frac{\kappa}{\mu l_0^2} \right) \sum_{\langle j \rangle} \Theta(\epsilon_{cr} - \epsilon_{ij}) f(\epsilon_{ij}) \hat{l}_{ij} \quad (3)$$

876  
877  
878

where starred quantities indicate dimensionless variables. The important nondimensional parameter that emerges is the ratio of bending to stretching stiffness,  $\kappa^* = \kappa/\mu l_0^2$ .

879  
880  
881  
882  
883  
884  
885  
886  
887  
888  
889  
890  
891  
892  
893  
894  
895  
896

For Euler-Bernoulli beams, the stretching and bending moduli are given by  $\mu = EA$  and  $\kappa = EI$ , where  $E$  is Young's modulus and  $A$  and  $I$  are the cross-sectional area and the second moment of inertia, respectively (35). For a beam of circular cross-section,  $A = \pi r^2$ , and  $I = \pi r^4/4$ , and the expected bending to stretching ratio is then  $\kappa/(\mu l_0^2) = r^2/(2l_0^2)$ . A fibrin fiber is estimated to be  $l_0 \cong 10 \mu\text{m}$  long and  $2r \cong 280 \text{ nm}$  thick (22),(66). Since fibrin is a bundle of protofibrils with bending modulus expected to be smaller than that of a uniform cylinder, we set the nondimensionalized ratio of bending to stretching stiffness parameter in the simulations to be  $\kappa^* = k \cdot [r^2/(2l_0^2)]$ , where  $r^2/(2l_0^2)$  is on the order of  $10^{-6}$ . Here,  $k$  is a factor less than unity, which accounts for the difference of fiber bending stiffness from the ideal limit of a uniform cylinder. The critical buckling strain is set to that of a uniform cylinder,  $\epsilon_{cr} = -\pi^2 r^2/l_0^2$ . The Young's modulus of individual fibers was chosen to  $E = 1.4 \text{ MPa}$  to match experimental shear modulus measurements. This comparatively low modulus is consistent with and lies within the wide range of measured stiffness of single fibrin fibers (22),(23),(81),(82). Using  $E = 1.4 \text{ MPa}$ , we estimate the critical buckling load,  $P_{cr} = E\pi^3 r^4/l_0^2 \cong 0.17 \text{ nN}$ , which is about two orders of magnitude smaller than the contractile force of an activated platelet ( $\sim 30 \text{ nN}$ ) (51). This suggests there is considerable platelet-induced fiber buckling in a typical PRP.

897  
898  
899  
900  
901  
902  
903  
904

The network contraction due to platelets is modeled by prescribing shorter reference length for all bonds attached to a platelet. Assuming that an activated platelet can generate maximum contraction force  $F_p^{max}$ , which corresponds to maximum generated strain  $\epsilon_p^{max} = F_p^{max}/\mu$  the corresponding reference bond length is given by  $l_{ij} / (1 + \epsilon_p^{max})$ . Thus, given values of platelet force correspond to the initial situation without any network deformation and externally applied shear strain. The forces in bonds attached to platelets are reduced via the initial relaxation at zero applied strain, and increase when shear strain is applied.

905  
906  
907  
908  
909  
910  
911  
912  
913  
914

We perform the relaxation dynamics, and integrate equation (3) in time, until a mechanical equilibrium state is reached, implying that the change in net force becomes negligibly small (typically less than  $10^{-6} \%$ ). Shear is applied on the network by displacing the upper and bottom boundary nodes by a fixed amount, while letting the other nodes move freely to balance forces in response to the applied strain. When the network reaches mechanical equilibrium, the applied strain is increased and the network relaxes to a new mechanical equilibrium. The increment of applied strain is chosen to be small (0.0005) to avoid large deformations near the boundary. Similar to the experiment, the upper and bottom boundaries were always clamped.

## 915 REFERENCES

- 916
- 917 1. J. W. Weisel, R. I. Litvinov, "Fibrin formation, structure and properties" in *Fibrous*
- 918 *Proteins: Structures and Mechanisms* (Springer, Cham, 2017), *Subcellular Biochemistry*, pp.
- 919 405–456.
- 920 2. F. Burla, Y. Mulla, B. E. Vos, A. Aufderhorst-Roberts, G. H. Koenderink, From mechanical
- 921 resilience to active material properties in biopolymer networks. *Nature Reviews Physics*. **1**,
- 922 249–263 (2019).
- 923 3. T. A. E. Ahmed, E. V. Dare, M. Hincke, Fibrin: a versatile scaffold for tissue engineering
- 924 applications. *Tissue Eng. Part B Rev.* **14**, 199–215 (2008).
- 925 4. S. Kattula, J. R. Byrnes, A. S. Wolberg, Fibrinogen and Fibrin in Hemostasis and
- 926 Thrombosis. *Arterioscler. Thromb. Vasc. Biol.* **37**, e13–e21 (2017).
- 927 5. S. J. Pathare, W. Eng, S. J. J. Lee, A. K. Ramasubramanian, Fibrin prestress due to platelet
- 928 aggregation and contraction increases clot stiffness. *Biophysical Reports* (2021) (available at
- 929 <https://www.sciencedirect.com/science/article/pii/S2667074721000227>).
- 930 6. K. C. Gersh, C. Nagaswami, J. W. Weisel, Fibrin network structure and clot mechanical
- 931 properties are altered by incorporation of erythrocytes. *Thromb. Haemost.* **102**, 1169–1175
- 932 (2009).
- 933 7. T. Feller, S. D. A. Connell, R. A. S. Ariëns, Why Fibrin Biomechanical Properties Matter for
- 934 Haemostasis and Thrombosis. *J. Thromb. Haemost.* (2021), doi:10.1111/jth.15531.
- 935 8. F. Pancaldi, O. V. Kim, J. W. Weisel, M. Alber, Z. Xu, Computational Biomechanical
- 936 Modeling of Fibrin Networks and Platelet-Fiber Network Interactions. *Current Opinion in*
- 937 *Biomedical Engineering*, 100369 (2022).
- 938 9. T. H. S. van Kempen, W. P. Donders, F. N. van de Vosse, G. W. M. Peters, A constitutive
- 939 model for developing blood clots with various compositions and their nonlinear viscoelastic
- 940 behavior. *Biomech. Model. Mechanobiol.* **15**, 279–291 (2016).
- 941 10. A. S. G. van Oosten, X. Chen, L. Chin, K. Cruz, A. E. Patteson, K. Pogoda, V. B. Shenoy, P.
- 942 A. Janmey, Emergence of tissue-like mechanics from fibrous networks confined by close-
- 943 packed cells. *Nature*. **573**, 96–101 (2019).
- 944 11. F. Ghezelbash, S. Liu, A. Shirazi-Adl, J. Li, Blood clot behaves as a poro-visco-elastic
- 945 material. *J. Mech. Behav. Biomed. Mater.* **128**, 105101 (2022).
- 946 12. B. Fereidoonzhad, P. McGarry, A new constitutive model for permanent deformation of
- 947 blood clots with application to simulation of aspiration thrombectomy. *J. Biomech.* **130**,
- 948 110865 (2021).
- 949 13. C. Storm, J. J. Pastore, F. C. MacKintosh, T. C. Lubensky, P. A. Janmey, Nonlinear
- 950 elasticity in biological gels. *Nature*. **435**, 191–194 (2005).
- 951 14. N. Takeishi, T. Shigematsu, R. Enosaki, S. Ishida, S. Ii, S. Wada, Development of a
- 952 mesoscopic framework spanning nanoscale protofibril dynamics to macro-scale fibrin clot
- 953 formation. *J. R. Soc. Interface.* **18**, 20210554 (2021).

- 954 15. S. Yesudasan, X. Wang, R. D. Averett, Fibrin polymerization simulation using a reactive  
955 dissipative particle dynamics method. *Biomech. Model. Mechanobiol.* **17**, 1389–1403 (2018).
- 956 16. A. Zhmurov, O. Kononova, R. I. Litvinov, R. I. Dima, V. Barsegov, J. W. Weisel,  
957 Mechanical transition from  $\alpha$ -helical coiled coils to  $\beta$ -sheets in fibrin(ogen). *J. Am. Chem.*  
958 *Soc.* **134**, 20396–20402 (2012).
- 959 17. A. Mann, R. S. Sopher, S. Goren, O. Shelah, O. Tchaicheeyan, A. Lesman, Force chains in  
960 cell-cell mechanical communication. *J. R. Soc. Interface.* **16**, 20190348 (2019).
- 961 18. M. Sarkar, J. Notbohm, Evolution of Force Chains Explains the Onset of Strain Stiffening in  
962 Fiber Networks. *J. Appl. Mech.*, 1–19 (2022).
- 963 19. E. A. Ryan, L. F. Mockros, A. M. Stern, L. Lorand, Influence of a natural and a synthetic  
964 inhibitor of factor XIIIa on fibrin clot rheology. *Biophys.J.* **77**, 2827–2836 (1999).
- 965 20. E. L. Hethershaw, A. L. Cilia La Corte, C. Duval, M. Ali, P. J. Grant, R. A. S. Ariëns, H.  
966 Philippou, The effect of blood coagulation factor XIII on fibrin clot structure and  
967 fibrinolysis. *J. Thromb. Haemost.* **12**, 197–205 (2014).
- 968 21. D. C. Rijken, S. Abdul, J. J. M. C. Malfliet, F. W. G. Leebeek, S. Uitte de Willige,  
969 Compaction of fibrin clots reveals the antifibrinolytic effect of factor XIII. *J. Thromb.*  
970 *Haemost.* **14**, 1453–1461 (2016).
- 971 22. J.-P. Collet, H. Shuman, R. E. Ledger, S. Lee, J. W. Weisel, The elasticity of an individual  
972 fibrin fiber in a clot. *Proc. Natl. Acad. Sci. U. S. A.* **102**, 9133–9137 (2005).
- 973 23. W. Liu, C. R. Carlisle, E. A. Sparks, M. Guthold, The mechanical properties of single fibrin  
974 fibers. *J. Thromb. Haemost.* **8**, 1030–1036 (2010).
- 975 24. J. Notbohm, A. Lesman, P. Rosakis, D. A. Tirrell, G. Ravichandran, Microbuckling of fibrin  
976 provides a mechanism for cell mechanosensing. *J. R. Soc. Interface.* **12**, 20150320 (2015).
- 977 25. X. Xu, S. A. Safran, Nonlinearities of biopolymer gels increase the range of force  
978 transmission. *Phys. Rev. E Stat. Nonlin. Soft Matter Phys.* **92**, 032728 (2015).
- 979 26. X. Ma, M. E. Schickel, M. D. Stevenson, A. L. Sarang-Sieminski, K. J. Gooch, S. N.  
980 Ghadiali, R. T. Hart, Fibers in the extracellular matrix enable long-range stress transmission  
981 between cells. *Biophys. J.* **104**, 1410–1418 (2013).
- 982 27. S. Natan, Y. Koren, O. Shelah, S. Goren, A. Lesman, Long-range mechanical coupling of  
983 cells in 3D fibrin gels. *Mol. Biol. Cell.* **31**, 1474–1485 (2020).
- 984 28. P. M. Nair, M. A. Meledeo, A. R. Wells, X. Wu, J. A. Bynum, K. P. Leung, B. Liu, A.  
985 Cheeniyil, A. K. Ramasubramanian, J. W. Weisel, A. P. Cap, Cold-stored platelets have  
986 better preserved contractile function in comparison with room temperature-stored platelets  
987 over 21 days. *Transfusion* . **61 Suppl 1**, S68–S79 (2021).
- 988 29. Y. Sun, O. Oshinowo, D. R. Myers, W. A. Lam, A. Alexeev, Resolving the missing link  
989 between single platelet force and clot contractile force. *iScience*, 103690 (2021).



- 990 30. M. A. Panteleev, N. Korin, K. D. Reesink, D. L. Bark, J. M. E. M. Cosemans, E. E.  
991 Gardiner, P. H. Mangin, Wall shear rates in human and mouse arteries: Standardization of  
992 hemodynamics for in vitro blood flow assays: Communication from the ISTH SSC  
993 subcommittee on biorheology. *J. Thromb. Haemost.* **19**, 588–595 (2021).
- 994 31. A. Sharma, A. J. Licup, K. A. Jansen, R. Rens, M. Sheinman, G. H. Koenderink, F. C.  
995 MacKintosh, Strain-controlled criticality governs the nonlinear mechanics of fibre networks.  
996 *Nat. Phys.* **12**, 584–587 (2016).
- 997 32. J. C. Maxwell, L. On the calculation of the equilibrium and stiffness of frames. *Lond. Edinb.*  
998 *Dublin Philos. Mag. J. Sci.* **27**, 294–299 (1864).
- 999 33. J. C. Maxwell, XLV. On reciprocal figures and diagrams of forces. *The London, Edinburgh,*  
1000 *and Dublin Philosophical Magazine and Journal of Science.* **27**, 250–261 (1864).
- 1001 34. C. P. Broedersz, X. Mao, T. C. Lubensky, F. C. MacKintosh, Criticality and isostaticity in  
1002 fibre networks. *Nat. Phys.* **7**, 983–988 (2011).
- 1003 35. L. D. Landau, E. M. Lifšic, E. M. Lifshitz, A. M. Kosevich, L. P. Pitaevskii, *Theory of*  
1004 *Elasticity: Volume 7* (Elsevier, 1986).
- 1005 36. C. Heussinger, E. Frey, Floppy modes and nonaffine deformations in random fiber networks.  
1006 *Phys. Rev. Lett.* **97**, 105501 (2006).
- 1007 37. P. R. Onck, T. Koeman, T. van Dillen, E. van der Giessen, Alternative explanation of  
1008 stiffening in cross-linked semiflexible networks. *Phys. Rev. Lett.* **95**, 178102 (2005).
- 1009 38. J. L. Shivers, J. Feng, A. S. G. van Oosten, H. Levine, P. A. Janmey, F. C. MacKintosh,  
1010 Compression stiffening of fibrous networks with stiff inclusions. *Proc. Natl. Acad. Sci. U. S.*  
1011 *A.* **117**, 21037–21044 (2020).
- 1012 39. K. F. Freund, K. P. Doshi, S. L. Gaul, D. A. Claremon, D. C. Remy, J. J. Baldwin, S. M.  
1013 Pitzenberger, A. M. Stern, Transglutaminase inhibition by 2-[(2-oxopropyl)thio]imidazolium  
1014 derivatives: mechanism of factor XIIIa inactivation. *Biochemistry.* **33**, 10109–10119 (1994).
- 1015 40. M. Bathe, C. Heussinger, M. M. A. E. Claessens, A. R. Bausch, E. Frey, Cytoskeletal bundle  
1016 mechanics. *Biophys. J.* **94**, 2955–2964 (2008).
- 1017 41. S. Britton, O. Kim, F. Pancaldi, Z. Xu, R. I. Litvinov, J. W. Weisel, M. Alber, Contribution  
1018 of nascent cohesive fiber-fiber interactions to the non-linear elasticity of fibrin networks  
1019 under tensile load. *Acta Biomater.* **94**, 514–523 (2019).
- 1020 42. J. Xia, L.-H. Cai, H. Wu, F. C. MacKintosh, D. A. Weitz, Anomalous mechanics of Zn<sup>2+</sup>-  
1021 modified fibrin networks. *Proc. Natl. Acad. Sci. U. S. A.* **118** (2021),  
1022 doi:10.1073/pnas.2020541118.
- 1023 43. I. K. Piechocka, R. G. Bacabac, M. Potters, F. C. Mackintosh, G. H. Koenderink, Structural  
1024 hierarchy governs fibrin gel mechanics. *Biophys. J.* **98**, 2281–2289 (2010).
- 1025 44. C. P. Broedersz, F. C. MacKintosh, Molecular motors stiffen non-affine semiflexible  
1026 polymer networks. *Soft Matter.* **7**, 3186–3191 (2011).

- 1027 45. A. Sharma, A. J. Licup, R. Rens, M. Vahabi, K. A. Jansen, G. H. Koenderink, F. C.  
1028 MacKintosh, Strain-driven criticality underlies nonlinear mechanics of fibrous networks.  
1029 *Physical review.E, Statistical, nonlinear, and soft matter physics*. **94** (2016).
- 1030 46. S. Münster, L. M. Jawerth, B. A. Leslie, J. I. Weitz, B. Fabry, D. A. Weitz, Strain history  
1031 dependence of the nonlinear stress response of fibrin and collagen networks. *Proc. Natl.*  
1032 *Acad. Sci. U. S. A.* **110**, 12197–12202 (2013).
- 1033 47. J. Feng, H. Levine, X. Mao, L. M. Sander, Nonlinear elasticity of disordered fiber networks.  
1034 *Soft Matter*. **12**, 1419–1424 (2016).
- 1035 48. E. Conti, F. C. Mackintosh, Cross-linked networks of stiff filaments exhibit negative normal  
1036 stress. *Phys. Rev. Lett.* **102**, 088102 (2009).
- 1037 49. M. Bouzid, E. Del Gado, Network Topology in Soft Gels: Hardening and Softening  
1038 Materials. *Langmuir*. **34**, 773–781 (2018).
- 1039 50. J. Hanke, D. Probst, A. Zemel, U. S. Schwarz, S. Köster, Dynamics of force generation by  
1040 spreading platelets. *Soft Matter*. **14**, 6571–6581 (2018).
- 1041 51. W. A. Lam, O. Chaudhuri, A. Crow, K. D. Webster, T.-D. Li, A. Kita, J. Huang, D. A.  
1042 Fletcher, Mechanics and contraction dynamics of single platelets and implications for clot  
1043 stiffening. *Nat. Mater.* **10**, 61–66 (2011).
- 1044 52. K. F. Standeven, A. M. Carter, P. J. Grant, J. W. Weisel, I. Chernysh, L. Masova, S. T. Lord,  
1045 R. A. S. Ariëns, Functional analysis of fibrin  $\{\gamma\}$ -chain cross-linking by activated  
1046 factor XIII: determination of a cross-linking pattern that maximizes clot stiffness. *Blood*.  
1047 **110**, 902–907 (2007).
- 1048 53. C. Duval, P. Allan, S. D. A. Connell, V. C. Ridger, H. Philippou, R. A. S. Ariëns, Roles of  
1049 fibrin  $\alpha$ - and  $\gamma$ -chain specific cross-linking by FXIIIa in fibrin structure and function.  
1050 *Thromb. Haemost.* **111**, 842–850 (2014).
- 1051 54. Y. Qiu, A. C. Brown, D. R. Myers, Y. Sakurai, R. G. Mannino, R. Tran, B. Ahn, E. T.  
1052 Hardy, M. F. Kee, S. Kumar, G. Bao, T. H. Barker, W. A. Lam, Platelet mechanosensing of  
1053 substrate stiffness during clot formation mediates adhesion, spreading, and activation. *Proc.*  
1054 *Natl. Acad. Sci. U. S. A.* **111**, 14430–14435 (2014).
- 1055 55. P. A. Janmey, J. P. Winer, J. W. Weisel, Fibrin gels and their clinical and bioengineering  
1056 applications. *J. R. Soc. Interface*. **6**, 1–10 (2009).
- 1057 56. J. V. Shah, P. A. Janmey, Strain hardening of fibrin gels and plasma clots. *Rheola Acta*. **36**,  
1058 262–268 (1997).
- 1059 57. N. A. Kurniawan, J. Grimbergen, J. Koopman, G. H. Koenderink, Factor XIII stiffens fibrin  
1060 clots by causing fiber compaction. *J. Thromb. Haemost.* **12**, 1687–1696 (2014).
- 1061 58. A. Kabla, L. Mahadevan, Nonlinear mechanics of soft fibrous networks. *J. R. Soc. Interface*.  
1062 **4**, 99–106 (2007).
- 1063 59. F. Meng, E. M. Terentjev, Theory of semiflexible filaments and networks. *Polymers (Basel)*.  
1064 **9**, 52 (2017).

- 1065 60. M. L. Gardel, J. H. Shin, F. C. MacKintosh, L. Mahadevan, P. Matsudaira, D. A. Weitz,  
1066 Elastic behavior of cross-linked and bundled actin networks. *Science*. **304**, 1301–1305  
1067 (2004).
- 1068 61. R. C. Picu, Mechanics of random fiber networks—a review. *Soft Matter*. **7**, 6768–6785  
1069 (2011).
- 1070 62. F. Maksudov, A. Daraei, A. Sessa, K. A. Marx, M. Guthold, V. Barsegov, Strength,  
1071 Deformability and Toughness of Uncrosslinked Fibrin Fibers from Theoretical  
1072 Reconstruction of Stress-Strain Curves. *Acta Biomater.* (2021),  
1073 doi:10.1016/j.actbio.2021.09.050.
- 1074 63. O. V. Kim, R. I. Litvinov, J. W. Weisel, M. S. Alber, Structural basis for the nonlinear  
1075 mechanics of fibrin networks under compression. *Biomaterials*. **35**, 6739–6749 (2014).
- 1076 64. X. Liang, I. Chernysh, P. K. Purohit, J. W. Weisel, Phase transitions during compression and  
1077 decompression of clots from platelet-poor plasma, platelet-rich plasma and whole blood.  
1078 *Acta Biomater.* **60**, 275–290 (2017).
- 1079 65. U. Windberger, V. Glanz, L. Ploszczanski, Laboratory Rat Thrombi Lose One-Third of  
1080 Their Stiffness When Exposed to Large Oscillating Shear Stress Amplitudes: Contrasting  
1081 Behavior to Human Clots. *International Journal of Translational Medicine*. **2**, 332–344  
1082 (2022).
- 1083 66. S.-J. J. Lee, D. M. Nguyen, H. S. Grewal, C. Puligundla, A. K. Saha, P. M. Nair, A. P. Cap,  
1084 A. K. Ramasubramanian, Image-based analysis and simulation of the effect of platelet  
1085 storage temperature on clot mechanics under uniaxial strain. *Biomech. Model. Mechanobiol.*  
1086 **19**, 173–187 (2019).
- 1087 67. M. Alzweighi, R. Mansour, J. Lahti, U. Hirn, A. Kulachenko, The influence of structural  
1088 variations on the constitutive response and strain variations in thin fibrous materials. *Acta*  
1089 *Mater.* **203**, 116460 (2021).
- 1090 68. C. Heussinger, E. Frey, Force distributions and force chains in random stiff fiber networks.  
1091 *Eur. Phys. J. E Soft Matter*. **24**, 47–53 (2007).
- 1092 69. M. S. Rudnicki, H. A. Cirka, M. Aghvami, E. A. Sander, Q. Wen, K. L. Billiar, Nonlinear  
1093 strain stiffening is not sufficient to explain how far cells can feel on fibrous protein gels.  
1094 *Biophys. J.* **105**, 11–20 (2013).
- 1095 70. A. S. Abhilash, B. M. Baker, B. Trappmann, C. S. Chen, V. B. Shenoy, Remodeling of  
1096 fibrous extracellular matrices by contractile cells: predictions from discrete fiber network  
1097 simulations. *Biophys. J.* **107**, 1829–1840 (2014).
- 1098 71. O. V. Kim, Z. Xu, E. D. Rosen, M. S. Alber, Fibrin networks regulate protein transport  
1099 during thrombus development. *PLoS Comput. Biol.* **9**, e1003095 (2013).
- 1100 72. R. S. Voronov, T. J. Stalker, L. F. Brass, S. L. Diamond, Simulation of intrathrombus fluid  
1101 and solute transport using in vivo clot structures with single platelet resolution. *Ann. Biomed.*  
1102 *Eng.* **41**, 1297–1307 (2013).

- 1103 73. A. V. Belyaev, M. A. Panteleev, F. I. Ataulakhanov, Threshold of microvascular occlusion:  
1104 injury size defines the thrombosis scenario. *Biophys. J.* **109**, 450–456 (2015).
- 1105 74. V. Govindarajan, S. Zhu, R. Li, Y. Lu, S. L. Diamond, J. Reifman, A. Y. Mitrophanov,  
1106 Impact of tissue factor localization on blood clot structure and resistance under venous shear.  
1107 *Biophys. J.* **114**, 978–991 (2018).
- 1108 75. Y. L. Han, P. Ronceray, G. Xu, A. Malandrino, R. D. Kamm, M. Lenz, C. P. Broedersz, M.  
1109 Guo, Cell contraction induces long-ranged stress stiffening in the extracellular matrix. *Proc.*  
1110 *Natl. Acad. Sci. U. S. A.* **115**, 4075–4080 (2018).
- 1111 76. N. A. Kurniawan, T. H. S. van Kempen, S. Sonneveld, T. T. Rosalina, B. E. Vos, K. A.  
1112 Jansen, G. W. M. Peters, F. N. van de Vosse, G. H. Koenderink, Buffers strongly modulate  
1113 fibrin self-assembly into fibrous networks. *Langmuir.* **33**, 6342–6352 (2017).
- 1114 77. C. J. Jen, L. V. McIntire, The structural properties and contractile force of a clot. *Cell Motil.*  
1115 **2**, 445–455 (1982).
- 1116 78. A. S. Caroline, S. R. Wayne, W. E. Kevin, NIH Image to ImageJ: 25 years of image analysis.  
1117 *Nat. Methods.* **9**, 671 (2012).
- 1118 79. C. Geuzaine, J.-F. Remacle, Gmsh: A 3-D finite element mesh generator with built-in pre-  
1119 and post-processing facilities. *Int. J. Numer. Methods Eng.* **79**, 1309–1331 (2009).
- 1120 80. S. Timoshenko, *Theory of elastic stability* (Tata McGraw-Hill Education, ed. 2, 1963).
- 1121 81. J. R. Houser, N. E. Hudson, L. Ping, E. T. O'Brien 3rd, R. Superfine, S. T. Lord, M. R.  
1122 Falvo, Evidence that  $\alpha$ C region is origin of low modulus, high extensibility, and strain  
1123 stiffening in fibrin fibers. *Biophys. J.* **99**, 3038–3047 (2010).
- 1124 82. M. Guthold, W. Liu, E. A. Sparks, L. M. Jawerth, L. Peng, M. Falvo, R. Superfine, R. R.  
1125 Hantgan, S. T. Lord, A comparison of the mechanical and structural properties of fibrin  
1126 fibers with other protein fibers. *Cell Biochem. Biophys.* **49**, 165–181 (2007).
- 1127



## 1128 ACKNOWLEDGMENTS

### 1129 **Funding**

1130 AG, KD, and AZ acknowledge support from National Science Foundation: NSF-CREST:  
1131 Center for Cellular and Biomolecular Machines (CCBM) at the University of California,  
1132 Merced: NSF HRD-1547848.

1133 AZ acknowledges computing time on the Multi-Environment Computer for Exploration  
1134 and Discovery (MERCED) cluster at UC Merced, which was funded by National Science  
1135 Foundation Grant No. ACI-1429783.

1136 AG acknowledges support from NSF through grant NSF-MCB-202678, and funding from  
1137 the National Science Foundation: NSF-CREST: Center for Cellular and Biomolecular  
1138 Machines (CCBM) at the University of California, Merced: NSF-HRD-1547848.

1139 TC was partially supported by funding from the San Jose State University Office of  
1140 Research.

1141 Microscopy was made possible using equipment from NSF Major Research  
1142 Instrumentation (MRI) Awards #1727072 and #1229817.

### 1143 **Author contributions** (alphabetically)

1144 Conceptualization: KD, AG, SJL, AKR, AZ

1145 Formal Analysis: KD, SJL, AKR, AZ

1146 Methodology: KD, SJL, AKR, AZ

1147 Investigation: MA, TC, KD, SJL, AKR, AZ

1148 Visualization: KD, SJL, AKR, AZ

1149 Supervision: KD, AKR

1150 Writing—original draft: KD, AKR, AZ

1151 Writing—review & editing: KD, AG, SJL, AKR, AZ

### 1152 **Competing interests**

1153 Authors declare that they have no competing interests.

### 1154 **Data and materials availability**

1155 All data needed to evaluate the conclusions in the paper are present in the paper and/or the  
1156 Supplementary Materials.
